# Supplementary material for: Retention time-independent strategy for screening pesticide residues in herbs based on a fingerprint database and all ion fragmentation acquisition with LC-QTOF MS
Source: Royal Society of Chemistry journal article supplement (doi:10.1039/d4ay01273a), 2024-01-01
Supplement: d4ay01273a1.pdf [file d4ay01273a1.pdf]

## Supporting Information

### **Retention time-independent strategy for screening pesticide residues in herbs based on a fingerprint database and all ion fragmentation acquisition with LC-QTOF MS**

Xiu-Ping Chen<sup>a, c#</sup>, Yu-Han Lu<sup>a, b#</sup>, Bo Xu<sup>a</sup>, Yi-Xin Wei<sup>a</sup>, Xia-Lian Cui<sup>a</sup>, Wen-Wen Zhang<sup>a</sup>, Gang-Feng Xu<sup>c\*</sup>, Fang Zhang<sup>a\*</sup>, Chen-Guo Feng<sup>a</sup>

<sup>a</sup> The Research Center of Chiral Drugs, Shanghai Frontiers Science Center for TCM Chemical Biology, Innovation Research Institute of Traditional Chinese Medicine, Shanghai University of Traditional Chinese Medicine, 1200 Cailun Road, Shanghai 201203, China

<sup>b</sup> School of Public Health, Shanghai University of Traditional Chinese Medicine, 1200 Cailun Road, Shanghai 201203, China

<sup>c</sup> Shanghai Pudong Institute for Food and Drug Control, 1043 Halei Road, Shanghai 201203, China

**Table S1. The fingerprint database of 150 pesticides**

| Number | Pesticide              | CAS No.      | Molecular Formula                                                 | Element Composition of Qualified Ions                                                                                                                                                                                                                                                                                                                                                                                                                                                                                                      | Accurate <i>m/z</i> of Qualified Ions                                                                        |
|--------|------------------------|--------------|-------------------------------------------------------------------|--------------------------------------------------------------------------------------------------------------------------------------------------------------------------------------------------------------------------------------------------------------------------------------------------------------------------------------------------------------------------------------------------------------------------------------------------------------------------------------------------------------------------------------------|--------------------------------------------------------------------------------------------------------------|
| 1      | Carbofuran-3-hydroxy   | [16655-82-6] | C <sub>12</sub> H <sub>13</sub> NO <sub>4</sub>                   | C <sub>12</sub> H <sub>15</sub> NO <sub>4</sub> Na, C <sub>12</sub> H <sub>15</sub> NO <sub>4</sub> NH <sub>4</sub> , C <sub>12</sub> H <sub>16</sub> NO <sub>4</sub> , C <sub>12</sub> H <sub>14</sub> NO <sub>3</sub> , C <sub>10</sub> H <sub>13</sub> O <sub>3</sub> , C <sub>10</sub> H <sub>11</sub> O <sub>2</sub> , C <sub>9</sub> H <sub>11</sub> O,<br>C <sub>7</sub> H <sub>7</sub> O, C <sub>7</sub> H <sub>7</sub> , C <sub>2</sub> H <sub>4</sub> NO                                                                         | 260.0893, 255.1339, 238.1074, 220.0968, 181.0859, 163.0754, 135.0804,<br>107.0491, 91.0542, 58.0287          |
| 2      | Aldicarb               | [116-06-3]   | C <sub>7</sub> H <sub>14</sub> N <sub>2</sub> O <sub>2</sub> S    | C <sub>7</sub> H <sub>14</sub> N <sub>2</sub> O <sub>2</sub> SNa, C <sub>7</sub> H <sub>14</sub> N <sub>2</sub> O <sub>2</sub> SNH <sub>4</sub> , C <sub>7</sub> H <sub>15</sub> N <sub>2</sub> O <sub>2</sub> S, C <sub>5</sub> H <sub>10</sub> NS, C <sub>2</sub> H <sub>5</sub> NO <sub>2</sub> Na, C <sub>4</sub> H <sub>9</sub> S, C <sub>4</sub> H <sub>6</sub> N,<br>C <sub>2</sub> H <sub>5</sub> S, C <sub>2</sub> H <sub>3</sub> S                                                                                               | 213.0668, 208.1114, 191.0849, 116.0528, 98.0212, 89.0419, 68.0495, 61.0106,<br>58.9950                       |
| 3      | Aldicarb-sulfone       | [1646-88-4]  | C <sub>7</sub> H <sub>14</sub> N <sub>2</sub> O <sub>4</sub> S    | C <sub>7</sub> H <sub>14</sub> N <sub>2</sub> O <sub>4</sub> SNa, C <sub>7</sub> H <sub>14</sub> N <sub>2</sub> O <sub>4</sub> SNH <sub>4</sub> , C <sub>7</sub> H <sub>15</sub> N <sub>2</sub> O <sub>4</sub> S, C <sub>5</sub> H <sub>10</sub> NO <sub>2</sub> S, C <sub>4</sub> H <sub>8</sub> NO, CH <sub>5</sub> O <sub>2</sub> S,<br>C <sub>2</sub> H <sub>6</sub> NO <sub>2</sub> , CH <sub>3</sub> OS, C <sub>3</sub> H <sub>7</sub> O                                                                                             | 245.0566, 240.1013, 223.0747, 148.0427, 86.0600, 81.0005, 76.0393, 62.9899,<br>59.0491                       |
| 4      | Aldicarb-sulfoxide     | [1646-87-3]  | C <sub>7</sub> H <sub>14</sub> N <sub>2</sub> O <sub>3</sub> S    | C <sub>7</sub> H <sub>14</sub> N <sub>2</sub> O <sub>3</sub> SNa, C <sub>7</sub> H <sub>14</sub> N <sub>2</sub> O <sub>3</sub> SNH <sub>4</sub> , C <sub>7</sub> H <sub>15</sub> N <sub>2</sub> O <sub>3</sub> S, C <sub>5</sub> H <sub>10</sub> NOS, C <sub>4</sub> H <sub>9</sub> S, C <sub>4</sub> H <sub>7</sub> N, CH <sub>5</sub> O <sub>2</sub> S,<br>C <sub>2</sub> H <sub>4</sub> NO                                                                                                                                              | 229.0617, 224.1063, 207.0798, 132.0478, 89.0419, 69.0573, 65.0056, 58.0287                                   |
| 5      | Cadusafos              | [95465-99-9] | C <sub>10</sub> H <sub>23</sub> O <sub>2</sub> PS <sub>2</sub>    | C <sub>10</sub> H <sub>23</sub> O <sub>2</sub> PS <sub>2</sub> Na, C <sub>10</sub> H <sub>23</sub> O <sub>2</sub> PS <sub>2</sub> NH <sub>4</sub> , C <sub>10</sub> H <sub>24</sub> O <sub>2</sub> PS <sub>2</sub> , C <sub>6</sub> H <sub>16</sub> O <sub>2</sub> PS <sub>2</sub> , C <sub>2</sub> H <sub>8</sub> O <sub>2</sub> PS <sub>2</sub> , H <sub>4</sub> O <sub>2</sub> PS <sub>2</sub> ,<br>H <sub>2</sub> O <sub>2</sub> PS, OPS                                                                                               | 293.0769, 288.1215, 271.0952, 215.0324, 158.9698, 130.9385, 96.9508, 78.9402                                 |
| 6      | Carbofuran             | [1563-66-2]  | C <sub>12</sub> H <sub>13</sub> NO <sub>3</sub>                   | C <sub>12</sub> H <sub>15</sub> NO <sub>3</sub> Na, C <sub>12</sub> H <sub>15</sub> NO <sub>3</sub> NH <sub>4</sub> , C <sub>12</sub> H <sub>16</sub> NO <sub>3</sub> , C <sub>10</sub> H <sub>13</sub> O <sub>2</sub> , C <sub>8</sub> H <sub>9</sub> O <sub>2</sub> , C <sub>7</sub> H <sub>7</sub> O <sub>2</sub> , C <sub>6</sub> H <sub>5</sub> , C <sub>4</sub> H <sub>7</sub>                                                                                                                                                       | 244.0944, 239.1392, 222.1125, 165.0911, 137.0597, 123.0441, 77.0386, 55.0542                                 |
| 7      | Chlordimeform          | [6164-98-3]  | C <sub>10</sub> H <sub>13</sub> ClN <sub>2</sub>                  | C <sub>10</sub> H <sub>13</sub> ClN <sub>2</sub> Na, C <sub>10</sub> H <sub>13</sub> ClN <sub>2</sub> NH <sub>4</sub> , C <sub>10</sub> H <sub>14</sub> [ <sup>37</sup> Cl]N <sub>2</sub> , C <sub>10</sub> H <sub>14</sub> ClN <sub>2</sub> , C <sub>8</sub> H <sub>7</sub> [ <sup>37</sup> Cl]N, C <sub>8</sub> H <sub>7</sub> ClN,<br>C <sub>7</sub> H <sub>6</sub> [ <sup>37</sup> Cl], C <sub>7</sub> H <sub>6</sub> Cl, C <sub>8</sub> H <sub>7</sub> N, C <sub>7</sub> H <sub>6</sub> , C <sub>7</sub> H <sub>5</sub>               | 219.0659, 214.1106, 199.0812, 197.084, 154.0233, 152.0262, 127.0124,<br>125.0153, 117.0573, 90.0462, 89.0386 |
| 8      | Chlorsulfuron          | [64902-72-3] | C <sub>12</sub> H <sub>12</sub> ClN <sub>3</sub> O <sub>4</sub> S | C <sub>12</sub> H <sub>12</sub> ClN <sub>3</sub> O <sub>4</sub> SNa, C <sub>12</sub> H <sub>12</sub> ClN <sub>3</sub> O <sub>4</sub> SNH <sub>4</sub> , C <sub>12</sub> H <sub>13</sub> [ <sup>37</sup> Cl]N <sub>3</sub> O <sub>4</sub> S, C <sub>12</sub> H <sub>13</sub> ClN <sub>3</sub> O <sub>4</sub> S,<br>C <sub>6</sub> H <sub>7</sub> N <sub>4</sub> O <sub>2</sub> , C <sub>5</sub> H <sub>9</sub> N <sub>4</sub> O, C <sub>2</sub> H <sub>4</sub> NO, C <sub>3</sub> H <sub>6</sub> N                                          | 380.0191, 375.0637, 360.0344, 358.0371, 167.0564, 141.0771, 58.0287, 56.0495                                 |
| 9      | Coumaphos              | [56-72-4]    | C <sub>14</sub> H <sub>16</sub> ClO <sub>3</sub> PS               | C <sub>14</sub> H <sub>16</sub> ClO <sub>3</sub> PSNa, C <sub>14</sub> H <sub>16</sub> ClO <sub>3</sub> PSNH <sub>4</sub> , C <sub>14</sub> H <sub>17</sub> [ <sup>37</sup> Cl]O <sub>3</sub> PS, C <sub>14</sub> H <sub>17</sub> ClO <sub>3</sub> PS,<br>C <sub>10</sub> H <sub>9</sub> [ <sup>37</sup> Cl]O <sub>3</sub> PS, C <sub>10</sub> H <sub>9</sub> ClO <sub>3</sub> PS, C <sub>10</sub> H <sub>8</sub> [ <sup>37</sup> Cl]O <sub>2</sub> S, C <sub>10</sub> H <sub>8</sub> ClO <sub>2</sub> S, H <sub>2</sub> O <sub>2</sub> PS | 385.0037, 380.0483, 365.0191, 363.0217, 308.9564, 306.9591, 228.9899,<br>226.9928, 96.9508                   |
| 10     | Demeton                | 8065-48-3    | C <sub>8</sub> H <sub>19</sub> O <sub>3</sub> PS <sub>2</sub>     | C <sub>8</sub> H <sub>19</sub> O <sub>3</sub> PS <sub>2</sub> Na, C <sub>8</sub> H <sub>19</sub> O <sub>3</sub> PS <sub>2</sub> NH <sub>4</sub> , C <sub>8</sub> H <sub>20</sub> O <sub>3</sub> PS <sub>2</sub> , C <sub>6</sub> H <sub>15</sub> O <sub>3</sub> PS <sub>2</sub> Na, C <sub>4</sub> H <sub>9</sub> S, C <sub>2</sub> H <sub>5</sub> S                                                                                                                                                                                       | 281.0405, 276.0851, 259.0586, 253.0092, 89.0419, 61.0106                                                     |
| 11     | Ethametsulfuron-methyl | [97780-06-8] | C <sub>15</sub> H <sub>18</sub> N <sub>6</sub> O <sub>6</sub> S   | C <sub>15</sub> H <sub>18</sub> N <sub>6</sub> O <sub>6</sub> SNa, C <sub>15</sub> H <sub>18</sub> N <sub>6</sub> O <sub>6</sub> SNH <sub>4</sub> , C <sub>15</sub> H <sub>19</sub> N <sub>6</sub> O <sub>6</sub> S, C <sub>7</sub> H <sub>10</sub> N <sub>5</sub> O <sub>2</sub> , C <sub>5</sub> H <sub>6</sub> N <sub>5</sub> O <sub>2</sub> , C <sub>3</sub> H <sub>3</sub> N <sub>2</sub> O                                                                                                                                           | 433.0901, 428.1347, 411.1081, 196.0829, 168.0516, 83.024                                                     |
| 12     | Ethoprophos            | [13194-48-4] | C <sub>8</sub> H <sub>19</sub> O <sub>2</sub> PS <sub>2</sub>     | C <sub>8</sub> H <sub>19</sub> O <sub>2</sub> PS <sub>2</sub> Na, C <sub>8</sub> H <sub>19</sub> O <sub>2</sub> PS <sub>2</sub> NH <sub>4</sub> , C <sub>8</sub> H <sub>20</sub> O <sub>2</sub> PS <sub>2</sub> , C <sub>6</sub> H <sub>16</sub> O <sub>2</sub> PS <sub>2</sub> , C <sub>3</sub> H <sub>10</sub> O <sub>2</sub> PS <sub>2</sub> , H <sub>4</sub> O <sub>2</sub> PS <sub>2</sub> ,<br>H <sub>2</sub> O <sub>2</sub> PS, OPS                                                                                                 | 265.0456, 260.0902, 243.0637, 215.0324, 172.9854, 130.9385, 96.9508, 78.9402                                 |

|    |                      |              |                                                                   |                                                                                                                             |                                                                                            |
|----|----------------------|--------------|-------------------------------------------------------------------|-----------------------------------------------------------------------------------------------------------------------------|--------------------------------------------------------------------------------------------|
| 13 | Fenamiphos           | [22224-92-6] | C <sub>13</sub> H <sub>22</sub> NO <sub>3</sub> PS                | C13H22NO3PSNa,C13H22NO3PSNH4,C13H23NO3PS,C11H19NO3PS,C8H13NO3PS,<br>C8H10O3PS,C7H7O3PS,C7H6OS                               | 326.095,321.1396,304.1131,276.0816,234.0348,217.0083,201.9848,<br>138.0134                 |
| 14 | Fenamiphos-sulfone   | [31972-44-8] | C <sub>13</sub> H <sub>22</sub> NO <sub>3</sub> PS                | C13H22NO5PSNa,C13H22NO5PSNH4,C13H23NO5PS,C11H19NO5PS,C8H13NO5PS,<br>C7H11NO3P,C7H8O,C7H7                                    | 358.0849,353.1296,336.1029,308.0716,266.0247,188.0471,108.057,91.0542                      |
| 15 | Fenamiphos-sulfoxide | [31972-43-7] | C <sub>13</sub> H <sub>22</sub> NO <sub>4</sub> PS                | C13H22NO4PSNa,C13H22NO4PSNH4,C13H23NO4PS,C11H19NO4PS,C8H10O4PS,<br>C8H11O2S,C7H8O2S,C7H8O,H3NO2P                            | 342.0899,337.1345,320.108,292.0767,233.0032,171.0474,156.024,108.057,<br>79.9896           |
| 16 | Fonofos              | [944-22-9]   | C <sub>10</sub> H <sub>15</sub> OPS <sub>2</sub>                  | C10H15OPS2Na,C10H15OPS2NH4,C10H16OPS2,C4H10OPS,C2H6OPS,H2OPS,PS                                                             | 269.0194,264.064,247.0375,137.0184,108.9871,80.9558,62.9453                                |
| 17 | Isazofos             | [42509-80-8] | C <sub>9</sub> H <sub>17</sub> CIN <sub>3</sub> O <sub>3</sub> PS | C9H17CIN3O3PSNa,C9H17CIN3O3PSNH4,C9H18[37C1]N3O3PS,C9H18CIN3O3PS,<br>C5H9[37C1]N3O,C5H9CIN3O,C2H3[37C1]N3O,C2H3CIN3O,H2O2PS | 336.0309,331.0755,316.0461,314.049,164.04,162.0429,121.993,119.9959,<br>96.9508            |
| 18 | Isocarbophos         | [24353-61-5] | C <sub>11</sub> H <sub>16</sub> NO <sub>4</sub> PS                | C11H16NO4PSNa,C11H16NO4PSNH4,C11H17NO4PS,C8H10NO4PSNa,C8H8NO4PNa,<br>C8H8O4PS,C7H5O2,H2O2PS                                 | 312.043,307.0876,290.061,269.996,236.0083,230.9875,121.0284,96.9508                        |
| 19 | Isofenphos-methyl    | [99675-03-3] | C <sub>14</sub> H <sub>22</sub> NO <sub>4</sub> PS                | C14H22NO4PSNa,C14H22NO4PSNH4,C14H23NO4PS,C11H16NO4PSNa,C8H7O4PSNa,<br>C8H8O4PS,C8H9NO4P,C7H8O3P,C7H5O2,C5H5                 | 354.0899,349.1345,332.108,312.043,252.9695,230.9875,214.0264,171.0206,<br>121.0284,65.0386 |
| 20 | Methamidophos        | [10265-92-6] | C <sub>2</sub> H <sub>8</sub> NO <sub>2</sub> PS                  | C2H8NO2PSNa,C2H8NO2PSNH4,C2H9NO2PS,C2H6O2PS,CH5NO2P,H3NO2P,CH4O2P,<br>H3NOP                                                 | 163.9906,159.0352,142.0086,124.9821,94.0052,79.9896,78.9943,63.9947                        |
| 21 | Metsulfuron-methyl   | [74223-64-6] | C <sub>14</sub> H <sub>15</sub> N <sub>3</sub> O <sub>6</sub> S   | C14H15N5O6SNa,C14H15N5O6SNH4,C14H16N5O6S,C8H7O4S,C6H7N4O2,C8H7O2,C6H5,<br>C3H6N                                             | 404.0635,399.1071,382.0816,199.006,167.0564,135.0441,77.0386,56.0495                       |
| 22 | Monocrotophos        | [6923-22-4]  | C <sub>7</sub> H <sub>14</sub> NO <sub>3</sub> P                  | C7H14NO5PNa,C7H14NO5PNH4,C7H15NO5P,C6H10O5P,C2H8O4P,C2H6O3P,C5H8NO,<br>C2H4NO                                               | 246.0502,241.0948,224.0682,193.026,127.0155,109.0049,98.06,58.0287                         |
| 23 | Phorate              | [298-02-2]   | C <sub>7</sub> H <sub>17</sub> O <sub>2</sub> PS <sub>3</sub>     | C7H17O2PS3Na,C7H17O2PS3NH4,C7H18O2PS3,C4H10O2PS,CH4O2PS2,H2O2PS,C3H7S                                                       | 283.002,278.0467,261.0201,153.0134,142.9385,96.9508,75.0263                                |
| 24 | Phorate-sulfone      | [2588-04-7]  | C <sub>7</sub> H <sub>17</sub> O <sub>4</sub> PS <sub>3</sub>     | C7H17O4PS3Na,C7H17O4PS3NH4,C7H18O4PS3,C6H16O4PS2,C4H12O3PS,C2H8O3PS,<br>H4O3PS,H2O2PS                                       | 314.9919,310.0365,293.0099,247.0222,171.0239,142.9926,114.9613,<br>96.9508                 |
| 25 | Phorate-sulfoxide    | [2588-03-6]  | C <sub>7</sub> H <sub>17</sub> O <sub>3</sub> PS <sub>3</sub>     | C7H17O3PS3Na,C7H17O3PS3NH4,C7H18O3PS3,C5H12O2PS2,C3H8O2PS2,CH4O2PS2,<br>H2O2PS,H2O2P                                        | 298.997,294.0416,277.015,199.0011,170.9698,142.9385,96.9508,64.9787                        |

|    |                    |               |                                                                               |                                                                                                                         |                                                                                             |
|----|--------------------|---------------|-------------------------------------------------------------------------------|-------------------------------------------------------------------------------------------------------------------------|---------------------------------------------------------------------------------------------|
| 26 | Phosfolan          | [947-02-4]    | C <sub>7</sub> H <sub>14</sub> NO <sub>3</sub> PS <sub>2</sub>                | C7H14NO3PS2Na,C7H14NO3PS2NH4,C7H15NO3PS2,C5H11NO3PS2,CH3NO3PS,C2H5S,<br>CH2NS                                           | 278.0045,273.0491,256.0225,227.9912,139.9566,61.0106,59.9902,                               |
| 27 | Phosphamidon       | [13171-21-6]  | C <sub>10</sub> H <sub>19</sub> CINO <sub>3</sub> P                           | C10H19CINO5PNa,C10H19CINO5PNH4,C10H20[37Cl]NO5P,C10H20CINO5P,<br>C8H13[37Cl]NO,C8H13CINO,C2H8O4P,C2H6O3P,C5H10NO,C3H6NO | 322.0582,317.1028,302.0737,300.0762,176.0652,174.068,127.0155,<br>109.0049,100.0757,72.0444 |
| 28 | Sulfotep           | [3689-24-5]   | C <sub>8</sub> H <sub>20</sub> O <sub>3</sub> P <sub>2</sub> S <sub>2</sub>   | C8H20O5P2S2Na,C8H20O5P2S2NH4,C8H21O5P2S2,C6H17O5P2S2,C4H12O3PS,<br>C2H8O3PS,H4O3PS,H2O2PS                               | 345.012,340.0566,323.03,294.9987,171.0239,142.9926,114.9613,96.9508                         |
| 29 | Terbufos-sulfone   | [56070-16-7]  | C <sub>9</sub> H <sub>21</sub> O <sub>4</sub> PS <sub>3</sub>                 | C9H21O4PS3Na,C9H21O4PS3NH4,C9H22O4PS3,C4H12O3PS,C2H8O3PS,H4O3PS,H2O2PS                                                  | 343.0232,338.0678,321.0412,171.0239,142.9926,114.9613,96.9508                               |
| 30 | Terbufos-sulfoxide | [10548-10-4]  | C <sub>9</sub> H <sub>21</sub> O <sub>3</sub> PS <sub>3</sub>                 | C9H21O3PS3Na,C9H21O3PS3NH4,C9H22O3PS3,C4H12O2PS2,C2H8O2PS2,H4O2PS2,<br>H2O2PS,C4H9                                      | 327.0283,322.0729,305.0463,187.0011,158.9698,130.9385,96.9508,57.0699                       |
| 31 | Acetamidrid        | [135410-20-7] | C <sub>10</sub> H <sub>11</sub> CIN <sub>4</sub>                              | C10H11CIN4Na,C10H11CIN4NH4,C10H12[37Cl]N4,C10H12CIN4,C6H5[37Cl]N,C6H5CIN,<br>C5H4[37Cl],C5H4Cl,C6H4N,C3H6N              | 245.0564,240.101,225.0717,223.0745,128.0076,126.0105,100.9967,98.9996,<br>90.0338,56.0495   |
| 32 | Bitertanol         | [55179-31-2]  | C <sub>20</sub> H <sub>23</sub> N <sub>3</sub> O <sub>2</sub>                 | C20H23N3O2Na,C20H23N3O2NH4,C20H24N3O2,C18H21O2,C6H11O,C2H4N3,C4H9                                                       | 360.1682,355.2129,338.1863,269.1536,99.0804,70.04,57.0699                                   |
| 33 | Carbaryl           | [63-25-2]     | C <sub>12</sub> H <sub>11</sub> NO <sub>2</sub>                               | C12H11NO2Na,C12H11NO2NH4,C12H12NO2,C10H9O,C10H7,C9H9,C9H7,C6H5                                                          | 224.0682,219.1128,202.0863,145.0648,127.0542,117.0699,115.0542,<br>77.0386                  |
| 34 | Carbendazim        | [10605-21-7]  | C <sub>9</sub> H <sub>9</sub> N <sub>3</sub> O <sub>2</sub>                   | C9H9N3O2Na,C9H9N3O2NH4,C9H10N3O2,C8H6N3O,C7H6N3,C6H5N2,C5H5                                                             | 214.0587,209.1033,192.0768,160.0505,132.0556,105.0447,65.0386                               |
| 35 | Clofentazine       | [74115-24-5]  | C <sub>14</sub> H <sub>8</sub> Cl <sub>2</sub> N <sub>4</sub>                 | C14H8Cl2N4Na,C14H8Cl2N4NH4,C14H9Cl[37Cl]N4,C14H9Cl2N4,C7H5[37Cl]N,C7H5CIN,<br>C7H4N,C6H3                                | 325.0018,320.0464,305.0171,303.0199,140.0076,138.0105,102.0338,<br>75.0229                  |
| 36 | Diethofencarb      | [87130-20-9]  | C <sub>14</sub> H <sub>21</sub> NO <sub>4</sub>                               | C14H21NO4Na,C14H21NO4NH4,C14H22NO4,C11H16NO4,C10H14NO2,C8H10NO2,<br>C6H6NO2,C5H5O2,C5H6N                                | 290.1363,285.1809,268.1543,226.1074,180.1019,152.0706,124.0393,<br>97.0284,80.0496          |
| 37 | Diflubenzuron      | [35367-38-5]  | C <sub>14</sub> H <sub>9</sub> ClF <sub>2</sub> N <sub>2</sub> O <sub>2</sub> | C14H9ClF2N2O2Na,C14H9ClF2N2O2NH4,C14H10[37Cl]F2N2O2,C14H10ClF2N2O2,<br>C7H6F2NO,C7H3F2O,C6H3F2                          | 333.0213,328.0659,313.0368,311.0393,158.0412,141.0146,113.0197                              |
| 38 | Dimethomorph       | [110488-70-5] | C <sub>21</sub> H <sub>22</sub> CINO <sub>4</sub>                             | C21H22CINO4Na,C21H22CINO4NH4,C21H23[37Cl]NO4,C21H23CINO4,C17H14[37Cl]O3,<br>C17H14ClO3,C9H9O3,C3H4NO                    | 410.113,405.1576,390.1289,388.131,303.0602,301.0626,165.0546,70.0287                        |
| 39 | Flusilazole        | [85509-19-9]  | C <sub>16</sub> H <sub>15</sub> F <sub>2</sub> N <sub>3</sub> Si              | C16H15F2N3SiNa,C16H15F2N3SiNH4,C16H16F2N3Si,C14H13F2Si,C12H9F2Si,C8H8FN3,<br>C7H6F                                      | 338.0896,333.1342,316.1076,247.0749,219.0436,165.0697,109.0448                              |

|    |                  |               |                                                                                |                                                                                                                                                                                |                                                                                                              |
|----|------------------|---------------|--------------------------------------------------------------------------------|--------------------------------------------------------------------------------------------------------------------------------------------------------------------------------|--------------------------------------------------------------------------------------------------------------|
| 40 | Forchlorfenuron  | [68157-60-8]  | C <sub>12</sub> H <sub>10</sub> ClN <sub>3</sub> O                             | C12H10ClN3ONa,C12H10ClN3ONH4,C12H11[37Cl]N3O,C12H11ClN3O,C5H6[37Cl]N2,<br>C5H6ClN2,C5H5N2,C4H4N                                                                                | 270.0405,265.0851,250.0559,248.0585,131.0185,129.0214,93.0447,66.0338                                        |
| 41 | Haloxypop-methyl | [69806-40-2]  | C <sub>16</sub> H <sub>13</sub> ClF <sub>3</sub> NO <sub>4</sub>               | C16H13ClF3NO4Na,C16H13ClF3NO4NH4,C16H14[37Cl]F3NO4,C16H14ClF3NO4,<br>C14H10[37Cl]F3NO2,C14H10ClF3NO2,C13H10[37Cl]F3NO,C13H10ClF3NO,<br>C12H6[37Cl]F3NO,C12H6ClF3NO,C7H7        | 398.0377,393.0823,378.0534,376.0558,318.0321,316.0347,290.0368,<br>288.0398,274.0055,272.0085,91.0542        |
| 42 | Hexythiazox      | [78587-05-0]  | C <sub>17</sub> H <sub>21</sub> ClN <sub>2</sub> O <sub>2</sub> S              | C17H21ClN2O2SNa,C17H21ClN2O2SNH4,C17H22[37Cl]N2O2S,C17H22ClN2O2S,<br>C10H11[37Cl]NOS,C10H11ClNOS,C9H11[37Cl]N,C9H11ClN,C9H8,C9H7                                               | 375.0904,370.1351,355.1056,353.1085,230.0215,228.0244,170.0546,<br>168.0575,116.0621,115.0542                |
| 43 | Imidacloprid     | [138261-41-3] | C <sub>9</sub> H <sub>10</sub> ClN <sub>3</sub> O <sub>2</sub>                 | C9H10ClN3O2Na,C9H10ClN3O2NH4,C9H11[37Cl]N3O2,C9H11ClN3O2,C9H10[37Cl]N4,<br>C9H10ClN4,C9H11N4,C9H9N4,C6H5N2                                                                     | 278.0415,273.0861,258.0569,256.0596,211.0559,209.0589,175.0978,<br>173.0822,105.0447                         |
| 44 | Indoxacarb       | [144171-61-9] | C <sub>22</sub> H <sub>17</sub> ClF <sub>3</sub> N <sub>3</sub> O <sub>7</sub> | C22H17[37Cl]F3N3O7Na,C22H17ClF3N3O7Na,C22H17ClF3N3O7NH4,<br>C22H18[37Cl]F3N3O7,C22H18ClF3N3O7,C13H10[37Cl]N2O4,C13H10ClN2O4,C9H7F3NO2,<br>C8H4F3NO2,C8H5[37Cl]N,C8H5ClN,C2H2NO | 552.057,550.0599,545.1045,530.0761,528.078,295.0294,293.0324,218.0423,<br>203.0189,152.0076,150.0105,56.0131 |
| 45 | Kresoxim-methyl  | [143390-89-0] | C <sub>18</sub> H <sub>19</sub> NO <sub>4</sub>                                | C18H19NO4Na,C18H19NO4NH4,C18H20NO4,C17H16NO3,C17H15O3,C15H13NO,<br>C15H12NO,C14H12N,C13H10N,C14H10,C8H6N                                                                       | 336.1206,331.1652,314.1387,282.1125,267.1016,223.0992,222.0913,<br>194.0964,180.0808,178.0777,116.0495,      |
| 46 | Metalaxyl        | [57837-19-1]  | C <sub>15</sub> H <sub>21</sub> NO <sub>4</sub>                                | C15H21NO4Na,C15H21NO4NH4,C15H22NO4,C14H18NO3,C13H18NO2,C12H18NO,<br>C11H14N,C10H14N,C9H12N,C9H10N                                                                              | 302.1363,297.1809,280.1543,248.1281,220.1332,192.1383,160.1121,<br>148.1121,134.0964,132.0808                |
| 47 | Omethoate        | [1113-02-6]   | C <sub>3</sub> H <sub>12</sub> NO <sub>4</sub> PS                              | C5H12NO4PSNa,C5H12NO4PSNH4,C5H13NO4PS,C4H8O4PS,C3H8O3PS,C2H6O2PS,<br>C2H6O3P,CH4O2P                                                                                            | 236.0117,231.0563,214.0297,182.9875,154.9926,124.9821,109.0049,<br>78.9943                                   |
| 48 | Phoxim           | [14816-18-3]  | C <sub>12</sub> H <sub>15</sub> N <sub>2</sub> O <sub>3</sub> PS               | C12H15N2O3PSNa,C12H15N2O3PSNH4,C12H16N2O3PS,C8H5N2,C2H6O2PS,H2O2PS,<br>C6H5                                                                                                    | 321.0433,316.0879,299.0614,129.0447,124.9821,96.9508,77.0386                                                 |
| 49 | Prochloraz       | [67747-09-5]  | C <sub>15</sub> H <sub>16</sub> Cl <sub>3</sub> N <sub>3</sub> O <sub>2</sub>  | C15H16Cl3N3O2Na,C15H16Cl3N3O2NH4,C15H17Cl2[37Cl]N3O2,C15H17Cl3N3O2,<br>C12H13Cl2[37Cl]NO2,C12H13Cl3NO2,C5H11N,C3H4NO,C3H6N                                                     | 398.02,393.0646,378.0353,376.0381,309.9978,308.0006,85.0886,70.0287,<br>56.0495                              |
| 50 | Prompamocarb     | [24579-73-5]  | C <sub>9</sub> H <sub>20</sub> N <sub>2</sub> O <sub>2</sub>                   | C9H20N2O2Na,C9H20N2O2NH4,C9H21N2O2,C7H14NO2,C4H8NO2,C2H4NO2,C3H8N                                                                                                              | 211.1417,206.1863,189.1598,144.1019,102.055,74.0237,58.0651                                                  |
| 51 | Pymetrozine      | [123312-89-0] | C <sub>10</sub> H <sub>11</sub> N <sub>3</sub> O                               | C10H11N3ONa,C10H11N3ONH4,C10H12N3O,C6H5N2,C5H5N,C5H4N                                                                                                                          | 240.0856,235.1302,218.1036,105.0447,79.0417,78.0338                                                          |
| 52 | Spinosad         | [168316-95-8] | C <sub>41</sub> H <sub>65</sub> NO <sub>10</sub>                               | C41H65NO10Na,C41H65NO10NH4,C41H66NO10,C8H16NO,C6H12N,C3H7O2                                                                                                                    | 754.4501,749.4947,732.4681,142.1226,98.0964,75.0441                                                          |

|    |                  |               |                                                                               |                                                                                                                                                                                   |                                                                                                                       |
|----|------------------|---------------|-------------------------------------------------------------------------------|-----------------------------------------------------------------------------------------------------------------------------------------------------------------------------------|-----------------------------------------------------------------------------------------------------------------------|
| 53 | Thiabendazole    | [148-79-8]    | C <sub>10</sub> H <sub>7</sub> N <sub>3</sub> S                               | C10H7N3SNa,C10H7N3SNH4,C10H8N3S,C9H7N2S,C8H7N2,C5H5                                                                                                                               | 224.0253,219.0699,202.0433,175.0324,131.0604,65.0386                                                                  |
| 54 | Thiamethoxam     | [153719-23-4] | C <sub>8</sub> H <sub>10</sub> ClN <sub>5</sub> O <sub>3</sub> S              | C8H10ClN5O3SNa,C8H10ClN5O3SNH4,C8H11[37Cl]N5O3S,C8H11ClN5O3S,C8H11N4OS,<br>C7H9N4S,C6H6N3S,C4H3ClNS,C5H6N3                                                                        | 314.0085,309.0531,294.0237,292.0266,211.0658,181.0542,152.0277,<br>131.9669,108.0556                                  |
| 55 | Tolfenpyrad      | [129558-76-5] | C <sub>21</sub> H <sub>22</sub> ClN <sub>5</sub> O <sub>2</sub>               | C21H22ClN5O2Na,C21H22ClN5O2NH4,C21H23[37Cl]N5O2,C21H23ClN5O2,C14H13O,<br>C12H10,C6H10[37Cl]N2,C6H10ClN2,C7H7                                                                      | 406.1293,401.1739,386.1452,384.1473,197.0961,154.0777,147.0498,<br>145.0527,91.0542                                   |
| 56 | Azoxystrobin     | [131860-33-8] | C <sub>22</sub> H <sub>17</sub> N <sub>5</sub> O <sub>5</sub>                 | C22H17N5O5Na,C22H17N5O5NH4,C22H18N3O5,C21H14N3O4,C20H14N3O3,<br>C19H11N3O3,C11H7N2O,C10H6NO2,C10H6NO                                                                              | 426.106,421.1506,404.1241,372.0979,344.103,329.0795,183.0553,172.0393,<br>156.0444                                    |
| 57 | Boscalid         | [188425-85-6] | C <sub>18</sub> H <sub>12</sub> Cl <sub>2</sub> N <sub>2</sub> O              | C18H12Cl2N2O2Na,C18H12Cl2N2ONH4,C18H13Cl[37Cl]N2O,C18H13Cl2N2O,<br>C18H12[37Cl]N2O,C18H12ClN2O,C18H12N2O,C18H11N2O,C5H4N                                                          | 365.0219,360.0665,345.0373,343.0399,309.0609,307.0633,272.0944,<br>271.0866,78.0338                                   |
| 58 | Buprofezin       | [69327-76-0]  | C <sub>16</sub> H <sub>23</sub> N <sub>3</sub> OS                             | C16H23N3OSNa,C16H23N3OSNH4,C16H24N3OS,C9H17N2OS,C7H8N,C4H9                                                                                                                        | 328.1454,323.19,306.1635,201.1056,106.0651,57.0699                                                                    |
| 59 | Carbosulfan      | [55285-14-8]  | C <sub>20</sub> H <sub>32</sub> N <sub>2</sub> O <sub>3</sub> S               | C20H32N2O3SNa,C20H32N2O3SNH4,C20H33N2O3S,C8H18NS,C5H12NS,C2H6NS,C4H9                                                                                                              | 403.2026,398.2472,381.2206,160.1154,118.0685,76.0219,57.0699                                                          |
| 60 | Clothianidin     | [210880-92-5] | C <sub>6</sub> H <sub>8</sub> ClN <sub>5</sub> O <sub>2</sub> S               | C6H8ClN5O2SNa,C6H8ClN5O2SNH4,C6H9[37Cl]N5O2S,C6H9ClN5O2S,C6H9N4S,<br>C4H3[37Cl]NS,C4H3ClNS,C4H5N2S,C3H3S                                                                          | 271.9979,267.0425,252.013,250.016,169.0542,133.9638,131.9669,113.0168,<br>70.995                                      |
| 61 | Cymoxanil        | [57966-95-7]  | C <sub>7</sub> H <sub>10</sub> N <sub>4</sub> O <sub>3</sub>                  | C7H10N4O3Na,C7H10N4O3NH4,C7H11N4O3,C4H6N3O2,C4H3N2O2,C3H3N2O,C2HN2                                                                                                                | 221.0645,216.1091,199.0826,128.0455,111.0189,83.024,53.0134                                                           |
| 62 | Cyromazine       | [66215-27-8]  | C <sub>6</sub> H <sub>10</sub> N <sub>6</sub>                                 | C6H10N6Na,C6H10N6NH4,C6H11N6,C2H5N4,C2H2N3,CH6N3,C3H6N                                                                                                                            | 189.0859,184.1305,167.104,85.0509,68.0243,60.0556,56.0495                                                             |
| 63 | Fenpropimorph    | [67564-91-4]  | C <sub>20</sub> H <sub>33</sub> NO                                            | C20H33NONa,C20H33NONH4,C20H34NO,C11H15,C10H12,C9H9,C4H9                                                                                                                           | 326.2454,321.29,304.2635,147.1168,132.0934,117.0699,57.0699                                                           |
| 64 | Flutriafol       | [76674-21-0]  | C <sub>16</sub> H <sub>13</sub> N <sub>3</sub> OF <sub>2</sub>                | C16H13N3OF2Na,C16H13N3OF2NH4,C16H14N3OF2,C7H4FO,C6H4F,C2H4N3                                                                                                                      | 324.0919,319.1365,302.1099,123.0241,95.0292,70.04                                                                     |
| 65 | Maleic hydrazide | [123-33-1]    | C <sub>4</sub> H <sub>4</sub> N <sub>2</sub> O <sub>2</sub>                   | C4H4N2O2Na,C4H4N2O2NH4,C4H5N2O2,C3H5N2O,C4H8N,C3H3N2,C2H5N2,C3HO                                                                                                                  | 135.0165,130.0611,113.0346,85.0396,70.0651,67.0291,57.0447,53.0022                                                    |
| 66 | Novaluron        | [116714-46-6] | C <sub>17</sub> H <sub>9</sub> ClF <sub>8</sub> N <sub>2</sub> O <sub>4</sub> | C17H9ClF8N2O4Na,C17H9ClF8N2O4NH4,C17H10[37Cl]F8N2O4,C17H10ClF8N2O4,<br>C7H6F2NO,C7H3F2O                                                                                           | 515.0015,510.0461,495.0173,493.0196,158.0412,141.0146                                                                 |
| 67 | Spirodiclofen    | [148477-71-8] | C <sub>21</sub> H <sub>24</sub> Cl <sub>2</sub> O <sub>4</sub>                | C21H24Cl2O4Na,C21H24Cl2O4NH4,C21H25Cl[37Cl]O4,C21H25Cl2O4,C15H15Cl[37Cl]O3,<br>C15H15Cl2O3,C15H13Cl[37Cl]O2,C15H13Cl2O2,C9H3Cl[37Cl]O2,C9H3Cl2O2,<br>C8H3Cl[37Cl]O,C8H3Cl2O,C5H11 | 433.0944,428.139,413.1099,411.1124,315.0366,313.0393,297.026,295.0287,<br>214.9476,212.9505,186.9527,184.9555,71.0855 |

|    |                     |               |                                                                                 |                                                                                                                                                                                                                                                                      |                                                                                                                                         |
|----|---------------------|---------------|---------------------------------------------------------------------------------|----------------------------------------------------------------------------------------------------------------------------------------------------------------------------------------------------------------------------------------------------------------------|-----------------------------------------------------------------------------------------------------------------------------------------|
| 68 | Spirotetramat       | [203313-25-1] | C <sub>21</sub> H <sub>27</sub> NO <sub>5</sub>                                 | C21H27NO5Na,C21H27NO5NH4,C21H28NO5,C20H28NO3,C18H24NO3,C17H20NO2,<br>C13H14NO2,C11H13                                                                                                                                                                                | 396.1781,391.2227,374.1962,330.2064,302.1751,270.1489,216.1019,<br>145.1012                                                             |
| 69 | Thiacloprid         | [111988-49-9] | C <sub>10</sub> H <sub>9</sub> ClN <sub>4</sub> S                               | C10H9ClN4SNa,C10H9ClN4SNH4,C10H10[37Cl]N4S,C10H10ClN4S,C6H5[37Cl]N,<br>C6H5ClN,C5H4[37Cl],C5H4Cl,C6H4N                                                                                                                                                               | 275.0129,270.0575,255.028,253.0309,128.0076,126.0105,100.9967,98.9996,<br>90.0338                                                       |
| 70 | Thiophanate-methyl  | [23564-05-8]  | C <sub>12</sub> H <sub>14</sub> N <sub>4</sub> O <sub>4</sub> S <sub>2</sub>    | C12H14N4O4S2Na,C12H14N4O4S2NH4,C12H15N4O4S2,C11H11N4O3S2,C9H6N3OS2,<br>C7H7N2S,C6H7N,C2H4NS                                                                                                                                                                          | 365.0349,360.0795,343.0529,311.0267,235.9947,151.0324,93.0573,74.0059                                                                   |
| 71 | Trichlorfon         | [52-68-6]     | C <sub>4</sub> H <sub>8</sub> Cl <sub>3</sub> O <sub>4</sub> P                  | C4H8Cl3O4PNa,C4H8Cl3O4PNH4,C4H9Cl[37Cl]2O4P,C4H9Cl2[37Cl]O4P,C4H9Cl3O4P,<br>C4H8Cl[37Cl]O4P,C4H8Cl2O4P,C2H6O3P,CHCl[37Cl],CHCl2,CH4O2P                                                                                                                               | 278.9118,273.9564,260.9242,258.927,256.9299,222.9503,220.9532,<br>109.0049,84.942,82.945,78.9943                                        |
| 72 | Zoxamide            | [156052-68-5] | C <sub>14</sub> H <sub>16</sub> Cl <sub>3</sub> NO <sub>2</sub>                 | C14H16Cl3NO2Na,C14H16Cl3NO2NH4,C14H17Cl[37Cl]2NO2,C14H17Cl2[37Cl]NO2,<br>C14H17Cl3NO2,C8H5Cl[37Cl]O,C8H5Cl2O,C7H5Cl[37Cl],C7H5Cl2                                                                                                                                    | 358.0139,353.0585,340.0265,338.0291,336.0319,188.9683,186.9712,<br>160.9734,158.9763                                                    |
| 73 | Amidosulfuron       | [120923-37-7] | C <sub>9</sub> H <sub>13</sub> N <sub>5</sub> O <sub>7</sub> S <sub>2</sub>     | C9H15N5O7S2Na,C9H15N5O7S2NH4,C9H16N5O7S2,C7H9N4O5S,C6H8N3O4S,C5H5N3O2,<br>C2HN2O                                                                                                                                                                                     | 392.0305,387.0751,370.0486,261.0288,218.023,139.0376,69.0083                                                                            |
| 74 | Benfuracarb         | [82560-54-1]  | C <sub>20</sub> H <sub>30</sub> N <sub>2</sub> O <sub>5</sub> S                 | C20H30N2O5SNa,C20H30N2O5SNH4,C20H31N2O5S,C12H14NO3S,C10H11O2S,<br>C10H10O2,C8H16NO2                                                                                                                                                                                  | 433.1768,428.2214,411.1948,252.0689,195.0474,162.0675,158.1176                                                                          |
| 75 | Bensulfuron-methyl  | [83055-99-6]  | C <sub>16</sub> H <sub>18</sub> N <sub>4</sub> O <sub>7</sub> S                 | C16H18N4O7SNa,C16H18N4O7SNH4,C16H19N4O7S,C7H8N3O3,C9H9O2,C8H7O,C7H7                                                                                                                                                                                                  | 433.0788,428.1234,411.0969,182.056,149.0597,119.0491,91.0542                                                                            |
| 76 | Bifenazate          | [149877-41-8] | C <sub>17</sub> H <sub>20</sub> N <sub>2</sub> O <sub>3</sub>                   | C17H20N2O3Na,C17H20N2O3NH4,C17H21N2O3,C13H12NO,C12H12N,C11H10N,C12H9,<br>C12H8                                                                                                                                                                                       | 323.1366,318.1812,301.1547,198.0913,170.0964,156.0808,153.0699,<br>152.0621                                                             |
| 77 | Chlorantraniliprole | [500008-45-7] | C <sub>18</sub> H <sub>14</sub> BrCl <sub>2</sub> N <sub>3</sub> O <sub>2</sub> | C18H14BrCl2N3O2Na,C18H14BrCl2N3O2NH4,C18H15[81Br]Cl[37Cl]N3O2,<br>C18H15[81Br]Cl2N3O2,C18H15BrCl2N3O2,C17H10[81Br]Cl[37Cl]N4O2,<br>C17H10[81Br]Cl2N4O2,C17H10BrCl2N4O2,C9H4[81Br][37Cl]N3O,C9H4[81Br]ClN3O,<br>C9H4BrClN3O,C8H4[37Cl]N3,C8H4ClN3,C5H3[37Cl]N,C5H3ClN | 503.96,499.0046,485.9734,483.9758,481.9781,454.9312,452.9336,450.9359,<br>287.9713,285.9199,283.9221,179.006,177.0088,113.9919,111.9949 |
| 78 | Chlorimuron-ethyl   | [90982-32-4]  | C <sub>15</sub> H <sub>15</sub> ClN <sub>4</sub> O <sub>6</sub> S               | C15H15ClN4O6SNa,C15H15ClN4O6SNH4,C15H16[37Cl]N4O6S,C15H16ClN4O6S,<br>C6H5[37Cl]N3O2,C6H5ClN3O2,C7H5O4S,C7H5O2,C3H3N2O                                                                                                                                                | 437.0293,432.0739,417.0449,415.0474,188.0037,186.0065,184.9903,<br>121.0284,83.024                                                      |
| 79 | Chlorobenzuron      | [57160-47-1]  | C <sub>14</sub> H <sub>10</sub> N <sub>2</sub> O <sub>2</sub> Cl <sub>2</sub>   | C14H10N2O2Cl2Na,C14H10N2O2Cl2NH4,C14H11N2O2Cl[37Cl],C14H11N2O2Cl2,<br>C7H7[37Cl]NO,C7H7ClNO,C7H4[37Cl]O,C7H4ClO,C6H4[37Cl],C6H4Cl                                                                                                                                    | 331.0012,326.0458,311.0165,309.0192,158.0182,156.0211,140.9917,<br>138.9945,112.9967,110.9996                                           |

|    |                     |               |                                                                   |                                                                                                                                                                 |                                                                                                               |
|----|---------------------|---------------|-------------------------------------------------------------------|-----------------------------------------------------------------------------------------------------------------------------------------------------------------|---------------------------------------------------------------------------------------------------------------|
| 80 | Chlorotoluron       | [15545-48-9]  | C <sub>10</sub> H <sub>13</sub> ClN <sub>2</sub> O                | C10H13ClN2ONa,C10H13ClN2ONH4,C10H14[37Cl]N2O,C10H14ClN2O,C7H7[37Cl]N,<br>C7H7ClN,C6H5,C3H6NO,C2H2NO                                                             | 235.0609,230.1055,215.0762,213.0789,142.0233,140.0262,77.0386,72.0444,<br>56.0131                             |
| 81 | Diafenthuron        | [80060-09-9]  | C <sub>23</sub> H <sub>32</sub> N <sub>2</sub> OS                 | C23H32N2OSNa,C23H32N2OSNH4,C23H33N2OS,C19H25N2OS,C16H19N2OS,C19H20NO,<br>C16H14NO                                                                               | 407.2128,402.2574,385.2308,329.1682,287.1213,278.1539,236.107                                                 |
| 82 | Fenpyroximate       | [111812-58-9] | C <sub>24</sub> H <sub>27</sub> N <sub>3</sub> O <sub>4</sub>     | C24H27N3O4Na,C24H27N3O4NH4,C24H28N3O4,C20H20N3O4,C12H13N3O,C6H8N3O,<br>C8H7O2,C7H7O                                                                             | 444.1894,439.234,422.2074,366.1448,215.1053,138.0662,135.0441,<br>107.0491                                    |
| 83 | Imidaclothiz        | [105843-36-5] | C <sub>7</sub> H <sub>8</sub> ClN <sub>3</sub> O <sub>2</sub> S   | C7H8ClN3O2SNa,C7H8ClN3O2SNH4,C7H9[37Cl]N3O2S,C7H9ClN3O2S,C7H9N4S,<br>C7H8N4S,C6H9N3,C6H8N3,C4H5N3                                                               | 283.9979,279.0425,264.0131,262.016,181.0542,180.0464,123.0791,<br>122.0713,95.0478                            |
| 84 | Monosulfuron        | [155860-63-2] | C <sub>12</sub> H <sub>11</sub> N <sub>3</sub> O <sub>3</sub> S   | C12H11N3O3SNa,C12H11N3O3SNH4,C12H12N3O3S,C6H6N3O,C5H8N3,C5H5N2                                                                                                  | 360.0373,355.0819,338.0554,136.0505,110.0713,93.0447                                                          |
| 85 | Prothioconazole     | [178928-70-6] | C <sub>14</sub> H <sub>15</sub> Cl <sub>2</sub> N <sub>3</sub> OS | C14H15Cl2N3OSNa,C14H15Cl2N3OSNH4,C14H16Cl[37Cl]N3OS,C14H16Cl2N3OS,<br>C14H14Cl[37Cl]N3S,C14H14Cl2N3S,C12H10[37Cl],C12H10Cl,C12H10,C7H6[37Cl],C7H6Cl,<br>C2H2N3S | 366.0205,361.0651,346.0357,344.0386,328.0251,326.028,191.0438,<br>189.0466,154.0777,127.0124,125.0153,102.012 |
| 86 | Pyraclostrobin      | [175013-18-0] | C <sub>19</sub> H <sub>18</sub> N <sub>3</sub> O <sub>4</sub> Cl  | C19H18N3O4ClNa,C19H18N3O4ClNH4,C19H19N3O4[37Cl],C19H19N3O4Cl,C10H12NO3,<br>C9H10NO2,C9H9NO2,C8H7NO2,C8H7NO,C7H7N                                                | 410.0878,405.1324,390.1037,388.1059,194.0812,164.0706,163.0628,<br>149.0471,133.0522,105.0573                 |
| 87 | Acephate            | [30560-19-1]  | C <sub>4</sub> H <sub>10</sub> NO <sub>3</sub> PS                 | C4H10NO3PSNa,C4H10NO3PSNH4,C4H11NO3PS,C2H8O3PS,C2H6O2PS,CH4O3P,<br>CH5NO2P,CH4O2P,H2O2P,H3NOP                                                                   | 206.0011,201.0457,184.0192,142.9926,124.9821,94.9893,94.0052,78.9943,<br>64.9787,63.9947                      |
| 88 | Bupirimate          | [41483-43-6]  | C <sub>13</sub> H <sub>24</sub> N <sub>4</sub> O <sub>3</sub> S   | C13H24N4O3SNa,C13H24N4O3SNH4,C13H25N4O3S,C11H20N3O,C8H12N3O,C2H6NO2S,<br>C5H8NO,C5H6NO                                                                          | 339.1461,334.1907,317.1642,210.1601,166.0975,108.0114,98.0587,96.0444                                         |
| 89 | Chlorpyrifos-methyl | [5598-13-0]   | C <sub>7</sub> H <sub>7</sub> Cl <sub>3</sub> NO <sub>3</sub> PS  | C7H7Cl3NO3PSNa,C7H7Cl3NO3PSNH4,C7H8Cl[37Cl]2NO3PS,C7H8Cl2[37Cl]NO3PS,<br>C7H8Cl3NO3PS,C6H4Cl[37Cl]2NO2PS,C6H4Cl2[37Cl]NO2PS,C6H4Cl3NO2PS,C2H6O2PS,<br>CH4O2P    | 343.8842,338.9288,325.8964,323.8993,321.9023,293.8701,291.8731,<br>289.876,124.9821,78.9943                   |
| 90 | Cyprodinil          | [121552-61-2] | C <sub>14</sub> H <sub>15</sub> N <sub>3</sub>                    | C14H15N3Na,C14H15N3NH4,C14H16N3,C7H10N,C6H7N,C6H5                                                                                                               | 248.1158,243.1604,226.1339,108.0808,93.0573,77.0386                                                           |
| 91 | Diazinon            | [333-41-5]    | C <sub>12</sub> H <sub>21</sub> N <sub>2</sub> O <sub>3</sub> PS  | C12H21N2O3PSNa,C12H21N2O3PSNH4,C12H22N2O3PS,C10H18N2O3PS,C8H13N2S,<br>C8H13N2O,H2O2PS,C5H5N2                                                                    | 327.0903,322.1349,305.1083,277.077,169.0794,153.1022,96.9508,93.0447                                          |



|     |                   |               |                                                                               |                                                                                                                                                                                                                                                                                                                                                                                                                                                                                                                                                                                                 |                                                                                                              |
|-----|-------------------|---------------|-------------------------------------------------------------------------------|-------------------------------------------------------------------------------------------------------------------------------------------------------------------------------------------------------------------------------------------------------------------------------------------------------------------------------------------------------------------------------------------------------------------------------------------------------------------------------------------------------------------------------------------------------------------------------------------------|--------------------------------------------------------------------------------------------------------------|
| 92  | Dichlorvos        | [62-73-7]     | C <sub>4</sub> H <sub>7</sub> Cl <sub>2</sub> O <sub>4</sub> P                | C <sub>4</sub> H <sub>7</sub> Cl <sub>2</sub> O <sub>4</sub> PNa, C <sub>4</sub> H <sub>7</sub> Cl <sub>2</sub> O <sub>4</sub> PNH <sub>4</sub> , C <sub>4</sub> H <sub>8</sub> Cl[37Cl]O <sub>4</sub> P, C <sub>4</sub> H <sub>8</sub> Cl <sub>2</sub> O <sub>4</sub> P, C <sub>2</sub> H <sub>8</sub> O <sub>4</sub> P, C <sub>2</sub> H <sub>6</sub> O <sub>3</sub> P, C <sub>2</sub> HCl[37Cl], C <sub>2</sub> HCl <sub>2</sub> , CH <sub>4</sub> O <sub>2</sub> P, C <sub>2</sub> H[37Cl], C <sub>2</sub> HCl                                                                              | 242.9351, 237.9797, 222.9503, 220.9532, 127.0155, 109.0049, 96.942, 94.945, 78.9943, 61.9732, 59.9761        |
| 93  | Epoxiconazole     | [133855-98-8] | C <sub>17</sub> H <sub>13</sub> ClFN <sub>3</sub> O                           | C <sub>17</sub> H <sub>13</sub> ClFN <sub>3</sub> ONa, C <sub>17</sub> H <sub>13</sub> ClFN <sub>3</sub> ONH <sub>4</sub> , C <sub>17</sub> H <sub>14</sub> [37Cl]FN <sub>3</sub> O, C <sub>17</sub> H <sub>14</sub> ClFN <sub>3</sub> O, C <sub>7</sub> H <sub>4</sub> FO, C <sub>8</sub> H <sub>6</sub> F, C <sub>8</sub> H <sub>5</sub>                                                                                                                                                                                                                                                      | 352.0623, 347.1069, 332.078, 330.0804, 123.0241, 121.0448, 101.0386                                          |
| 94  | Imazalil          | [35554-44-0]  | C <sub>14</sub> H <sub>14</sub> Cl <sub>2</sub> N <sub>2</sub> O              | C <sub>14</sub> H <sub>14</sub> Cl <sub>2</sub> N <sub>2</sub> ONa, C <sub>14</sub> H <sub>14</sub> Cl <sub>2</sub> N <sub>2</sub> ONH <sub>4</sub> , C <sub>14</sub> H <sub>15</sub> Cl[37Cl]N <sub>2</sub> O, C <sub>14</sub> H <sub>15</sub> Cl <sub>2</sub> N <sub>2</sub> O, C <sub>7</sub> H <sub>5</sub> Cl[37Cl], C <sub>7</sub> H <sub>5</sub> Cl <sub>2</sub> , C <sub>3</sub> H <sub>5</sub> N <sub>2</sub>                                                                                                                                                                          | 319.0375, 314.0821, 299.0528, 297.0556, 160.9734, 158.9763, 69.0447                                          |
| 95  | Malathion         | [121-75-5]    | C <sub>10</sub> H <sub>19</sub> O <sub>6</sub> PS <sub>2</sub>                | C <sub>10</sub> H <sub>19</sub> O <sub>6</sub> PS <sub>2</sub> Na, C <sub>10</sub> H <sub>19</sub> O <sub>6</sub> PS <sub>2</sub> NH <sub>4</sub> , C <sub>10</sub> H <sub>20</sub> O <sub>6</sub> PS <sub>2</sub> , C <sub>8</sub> H <sub>14</sub> O <sub>5</sub> PS <sub>2</sub> , C <sub>6</sub> H <sub>7</sub> O <sub>3</sub> , C <sub>2</sub> H <sub>6</sub> O <sub>2</sub> PS, C <sub>4</sub> H <sub>3</sub> O <sub>3</sub>                                                                                                                                                               | 353.0253, 348.0699, 331.0433, 285.0015, 127.039, 124.9821, 99.0077                                           |
| 96  | Metolachlor       | [51218-45-2]  | C <sub>15</sub> H <sub>22</sub> ClNO <sub>2</sub>                             | C <sub>15</sub> H <sub>22</sub> ClNO <sub>2</sub> Na, C <sub>15</sub> H <sub>22</sub> ClNO <sub>2</sub> NH <sub>4</sub> , C <sub>15</sub> H <sub>23</sub> [37Cl]NO <sub>2</sub> , C <sub>15</sub> H <sub>23</sub> ClNO <sub>2</sub> , C <sub>14</sub> H <sub>19</sub> [37Cl]NO, C <sub>14</sub> H <sub>19</sub> ClNO, C <sub>12</sub> H <sub>18</sub> N, C <sub>9</sub> H <sub>12</sub> N, C <sub>9</sub> H <sub>11</sub> N, C <sub>7</sub> H <sub>7</sub>                                                                                                                                      | 306.1231, 301.1677, 286.1387, 284.1412, 254.1124, 252.115, 176.1434, 134.0964, 133.0886, 91.0542             |
| 97  | Napropamide       | [15299-99-7]  | C <sub>17</sub> H <sub>21</sub> NO <sub>2</sub>                               | C <sub>17</sub> H <sub>21</sub> NO <sub>2</sub> Na, C <sub>17</sub> H <sub>21</sub> NO <sub>2</sub> NH <sub>4</sub> , C <sub>17</sub> H <sub>22</sub> NO <sub>2</sub> , C <sub>13</sub> H <sub>11</sub> O <sub>2</sub> , C <sub>12</sub> H <sub>11</sub> O, C <sub>7</sub> H <sub>15</sub> NO, C <sub>4</sub> H <sub>10</sub> N, C <sub>3</sub> H <sub>8</sub> N, C <sub>3</sub> H <sub>5</sub> O                                                                                                                                                                                               | 294.1465, 289.1911, 272.1645, 199.0754, 171.0804, 129.1148, 72.0808, 58.0651, 57.0335                        |
| 98  | Oxadixyl          | [77732-09-3]  | C <sub>14</sub> H <sub>18</sub> N <sub>2</sub> O <sub>4</sub>                 | C <sub>14</sub> H <sub>18</sub> N <sub>2</sub> O <sub>4</sub> Na, C <sub>14</sub> H <sub>18</sub> N <sub>2</sub> O <sub>4</sub> NH <sub>4</sub> , C <sub>14</sub> H <sub>19</sub> N <sub>2</sub> O <sub>4</sub> , C <sub>12</sub> H <sub>15</sub> N <sub>2</sub> O <sub>2</sub> , C <sub>9</sub> H <sub>11</sub> N, C <sub>9</sub> H <sub>10</sub> N, C <sub>8</sub> H <sub>7</sub> N, C <sub>4</sub> H <sub>8</sub> NO <sub>2</sub>                                                                                                                                                            | 301.1159, 296.1605, 279.1339, 219.1128, 133.0886, 132.0808, 117.0573, 102.055                                |
| 99  | Phosalone         | [2310-17-0]   | C <sub>12</sub> H <sub>15</sub> ClNO <sub>4</sub> PS <sub>2</sub>             | C <sub>12</sub> H <sub>15</sub> ClNO <sub>4</sub> PS <sub>2</sub> Na, C <sub>12</sub> H <sub>15</sub> ClNO <sub>4</sub> PS <sub>2</sub> NH <sub>4</sub> , C <sub>12</sub> H <sub>16</sub> [37Cl]NO <sub>4</sub> PS <sub>2</sub> , C <sub>12</sub> H <sub>16</sub> ClNO <sub>4</sub> PS <sub>2</sub> , C <sub>8</sub> H <sub>5</sub> [37Cl]NO <sub>2</sub> , C <sub>8</sub> H <sub>5</sub> ClNO <sub>2</sub> , C <sub>7</sub> H <sub>5</sub> [37Cl]N, C <sub>7</sub> H <sub>5</sub> ClN, C <sub>6</sub> H <sub>4</sub> [37Cl], C <sub>6</sub> H <sub>4</sub> Cl, C <sub>7</sub> H <sub>4</sub> N | 389.9761, 385.0207, 369.9913, 367.9941, 183.9976, 182.0003, 140.0076, 138.0105, 112.9967, 110.9996, 102.0338 |
| 100 | Pirimiphos-methyl | [29232-93-7]  | C <sub>11</sub> H <sub>20</sub> N <sub>3</sub> O <sub>3</sub> PS              | C <sub>11</sub> H <sub>20</sub> N <sub>3</sub> O <sub>3</sub> PSNa, C <sub>11</sub> H <sub>20</sub> N <sub>3</sub> O <sub>3</sub> PSNH <sub>4</sub> , C <sub>11</sub> H <sub>21</sub> N <sub>3</sub> O <sub>3</sub> PS, C <sub>9</sub> H <sub>14</sub> N <sub>3</sub> , C <sub>5</sub> H <sub>6</sub> N <sub>3</sub> , C <sub>3</sub> H <sub>3</sub> N <sub>2</sub>                                                                                                                                                                                                                             | 328.0855, 323.1301, 306.1036, 164.1182, 108.0556, 67.0291                                                    |
| 101 | Propanil          | [709-98-8]    | C <sub>9</sub> H <sub>9</sub> NOCl <sub>2</sub>                               | C <sub>9</sub> H <sub>9</sub> NOCl <sub>2</sub> Na, C <sub>9</sub> H <sub>9</sub> NOCl <sub>2</sub> NH <sub>4</sub> , C <sub>9</sub> H <sub>10</sub> NOCl[37Cl], C <sub>9</sub> H <sub>10</sub> NOCl <sub>2</sub> , C <sub>6</sub> H <sub>6</sub> Cl[37Cl]N, C <sub>6</sub> H <sub>6</sub> Cl <sub>2</sub> N, C <sub>6</sub> H <sub>6</sub> [37Cl]N, C <sub>6</sub> H <sub>6</sub> ClN, C <sub>6</sub> H <sub>6</sub> N, C <sub>3</sub> H <sub>5</sub> O                                                                                                                                        | 239.9953, 235.0399, 220.0105, 218.0134, 163.9843, 161.9872, 129.0154, 127.0183, 92.0495, 57.0335             |
| 102 | Propiconazole     | [60207-90-1]  | C <sub>15</sub> H <sub>17</sub> Cl <sub>2</sub> N <sub>3</sub> O <sub>2</sub> | C <sub>15</sub> H <sub>17</sub> Cl <sub>2</sub> N <sub>3</sub> O <sub>2</sub> Na, C <sub>15</sub> H <sub>17</sub> Cl <sub>2</sub> N <sub>3</sub> O <sub>2</sub> NH <sub>4</sub> , C <sub>15</sub> H <sub>18</sub> Cl[37Cl]N <sub>3</sub> O <sub>2</sub> , C <sub>15</sub> H <sub>18</sub> Cl <sub>2</sub> N <sub>3</sub> O <sub>2</sub> , C <sub>7</sub> H <sub>5</sub> Cl[37Cl], C <sub>7</sub> H <sub>5</sub> Cl <sub>2</sub> , C <sub>5</sub> H <sub>9</sub>                                                                                                                                 | 364.059, 359.1036, 344.0744, 342.0771, 160.9734, 158.9763, 69.0699                                           |
| 103 | Triadimenol       | [55219-65-3]  | C <sub>14</sub> H <sub>18</sub> N <sub>3</sub> O <sub>2</sub> Cl              | C <sub>14</sub> H <sub>18</sub> N <sub>3</sub> O <sub>2</sub> ClNa, C <sub>14</sub> H <sub>18</sub> N <sub>3</sub> O <sub>2</sub> ClNH <sub>4</sub> , C <sub>14</sub> H <sub>19</sub> N <sub>3</sub> O <sub>2</sub> [37Cl], C <sub>14</sub> H <sub>19</sub> N <sub>3</sub> O <sub>2</sub> Cl, C <sub>6</sub> H <sub>11</sub> O, C <sub>6</sub> H <sub>5</sub> , C <sub>2</sub> H <sub>4</sub> N <sub>3</sub>                                                                                                                                                                                    | 318.098, 313.1426, 298.1135, 296.116, 99.0804, 77.0386, 70.04                                                |
| 104 | Triazophos        | [24017-47-8]  | C <sub>12</sub> H <sub>16</sub> N <sub>3</sub> O <sub>3</sub> PS              | C <sub>12</sub> H <sub>16</sub> N <sub>3</sub> O <sub>3</sub> PSNa, C <sub>12</sub> H <sub>16</sub> N <sub>3</sub> O <sub>3</sub> PSNH <sub>4</sub> , C <sub>12</sub> H <sub>17</sub> N <sub>3</sub> O <sub>3</sub> PS, C <sub>8</sub> H <sub>8</sub> N <sub>3</sub> O, C <sub>7</sub> H <sub>7</sub> N <sub>2</sub> , H <sub>2</sub> O <sub>2</sub> PS                                                                                                                                                                                                                                         | 336.0542, 331.0988, 314.0723, 162.0662, 119.0604, 96.9508                                                    |
| 105 | Benalaxyl         | [71626-11-4]  | C <sub>20</sub> H <sub>23</sub> NO <sub>3</sub>                               | C <sub>20</sub> H <sub>23</sub> NO <sub>3</sub> Na, C <sub>20</sub> H <sub>23</sub> NO <sub>3</sub> NH <sub>4</sub> , C <sub>20</sub> H <sub>24</sub> NO <sub>3</sub> , C <sub>19</sub> H <sub>20</sub> NO <sub>2</sub> , C <sub>12</sub> H <sub>18</sub> NO <sub>2</sub> , C <sub>10</sub> H <sub>14</sub> N, C <sub>7</sub> H <sub>7</sub>                                                                                                                                                                                                                                                    | 348.157, 343.2016, 326.1751, 294.1489, 208.1332, 148.1121, 91.0542                                           |

|     |                    |               |                                                                               |                                                                                                                                                                      |                                                                                                      |
|-----|--------------------|---------------|-------------------------------------------------------------------------------|----------------------------------------------------------------------------------------------------------------------------------------------------------------------|------------------------------------------------------------------------------------------------------|
| 106 | Cyproconazole      | [94361-06-5]  | C <sub>15</sub> H <sub>18</sub> ClN <sub>3</sub> O                            | C15H18ClN3ONa,C15H18ClN3ONH4,C15H19[37Cl]N3O,C15H19ClN3O,C7H6[37Cl],<br>C7H6Cl,C2H4N3                                                                                | 314.1031,309.1477,294.1186,292.1211,127.0124,125.0153,70.04                                          |
| 107 | Difenoconazole     | [119446-68-3] | C <sub>19</sub> H <sub>17</sub> Cl <sub>2</sub> N <sub>3</sub> O <sub>3</sub> | C19H17Cl2N3O3Na,C19H17Cl2N3O3NH4,C19H18Cl[37Cl]N3O3,C19H18Cl2N3O3,<br>C13H9Cl[37Cl]O,C13H9Cl2O,C12H9[37Cl],C12H9Cl                                                   | 428.0539,423.0985,408.0694,406.072,252.9997,251.0025,190.036,188.0387                                |
| 108 | Etoxadole          | [153233-91-1] | C <sub>21</sub> H <sub>23</sub> F <sub>2</sub> N <sub>2</sub> O <sub>2</sub>  | C21H23F2NO2Na,C21H23F2NO2NH4,C21H24F2NO2,C17H16F2NO2,C7H3F2O,C6H3F2,<br>C4H9                                                                                         | 382.1589,377.2035,360.177,304.1144,141.0146,113.0197,57.0699                                         |
| 109 | Fenamidone         | [161326-34-7] | C <sub>17</sub> H <sub>17</sub> N <sub>3</sub> OS                             | C17H17N3OSNa,C17H17N3OSNH4,C17H18N3OS,C16H14N3O,C15H14N3,C6H6N,C5H5                                                                                                  | 334.0985,329.1431,312.1165,264.1131,236.1182,92.0495,65.0386                                         |
| 110 | Fenobucarb         | [3766-81-2]   | C <sub>12</sub> H <sub>17</sub> NO <sub>2</sub>                               | C12H17NO2Na,C12H17NO2NH4,C12H18NO2,C8H9NO2Na,C8H10NO2,C6H7O,C6H5,C4H9                                                                                                | 230.1151,225.1598,208.1332,174.0525,152.0706,95.0491,77.0386,57.0699                                 |
| 111 | Fenthion-sulfone   | [3761-42-0]   | C <sub>10</sub> H <sub>15</sub> O <sub>5</sub> PS <sub>2</sub>                | C10H15O5PS2Na,C10H15O5PS2NH4,C10H16O5PS2,C9H12O4PS2,C2H6O2PS,C2H6O3P,<br>CH4O2P                                                                                      | 332.9991,328.0437,311.0171,278.9909,124.9821,109.0049,78.9943                                        |
| 112 | Fenthion-sulfoxide | [3761-41-9]   | C <sub>10</sub> H <sub>15</sub> O <sub>4</sub> PS <sub>2</sub>                | C10H15O4PS2Na,C10H15O4PS2NH4,C10H16O4PS2,C9H13O4PS2,C2H6O2PS,C2H6O3P,<br>CH4O2P                                                                                      | 317.0042,312.0488,295.0222,279.9987,124.9821,109.0049,78.9943                                        |
| 113 | Flutolanil         | [66332-96-5]  | C <sub>17</sub> H <sub>16</sub> F <sub>3</sub> N <sub>2</sub> O <sub>2</sub>  | C17H16F3NO2Na,C17H16F3NO2NH4,C17H17F3NO2,C14H11F3NO2,C14H10F2NO2,<br>C14H9FNO2,C6H5O,C5H5                                                                            | 346.1025,341.1471,324.1206,282.0736,262.0674,242.0612,93.0335,65.0386                                |
| 114 | Fluazifop-butyl    | [69806-50-4]  | C <sub>19</sub> H <sub>20</sub> F <sub>3</sub> NO <sub>4</sub>                | C19H20F3NO4Na,C19H20F3NO4NH4,C19H21F3NO4,C15H13F3NO4,C14H11F3NO2,<br>C12H7F3NO,C7H7                                                                                  | 406.1237,401.1683,384.1417,328.0791,282.0736,238.0474,91.0543                                        |
| 115 | Oxadiazon          | [19666-30-9]  | C <sub>15</sub> H <sub>18</sub> Cl <sub>2</sub> N <sub>2</sub> O <sub>3</sub> | C15H18Cl2N2O3Na,C15H18Cl2N2O3NH4,C15H19Cl[37Cl]N2O3,C15H19Cl2N2O3,<br>C12H13Cl[37Cl]N2O3,C12H13Cl2N2O3,C7H4Cl[37Cl]NO3,C7H4Cl2NO3,C7H4[37Cl]NO3,<br>C7H4ClNO3,C6H9O2 | 367.0587,362.1033,347.074,345.0767,305.027,303.0298,221.9534,219.9563,<br>186.9847,184.9874,113.0597 |
| 116 | Pyriproxyfen       | [95737-68-1]  | C <sub>20</sub> H <sub>19</sub> NO <sub>3</sub>                               | C20H19NO3Na,C20H19NO3NH4,C20H20NO3,C12H9O2,C5H6NO,C5H4N,C6H5                                                                                                         | 344.1257,339.1703,322.1438,185.0597,96.0444,78.0338,77.0386                                          |
| 117 | Quinoxifen         | [124495-18-7] | C <sub>15</sub> H <sub>8</sub> NOFCl <sub>2</sub>                             | C15H8NOFCl2Na,C15H8NOFCl2NH4,C15H9NOFCl[37Cl],C15H9NOFCl2,C9H5Cl[37Cl]N,<br>C9H5Cl2N,C9H5[37Cl]N,C9H5ClN,C6H4F                                                       | 329.9859,325.0305,310.0012,308.004,198.9765,196.9794,164.0077,<br>162.0105,95.0292                   |
| 118 | Simazine           | [122-34-9]    | C <sub>7</sub> H <sub>12</sub> ClN <sub>3</sub>                               | C7H12ClN3Na,C7H12ClN3NH4,C7H13[37Cl]N3,C7H13ClN3,C6H10N3,C2H3[37Cl]N3,<br>C2H3ClN3,C2H2N3,CH[37Cl]N,CHClN                                                            | 224.0673,219.1119,204.0825,202.0854,124.0869,105.9981,104.001,68.0243,<br>63.9763,61.9792            |

|     |                |               |                                                                                 |                                                                                                                                                                                                                                                                                                                                                                                                                                                                                                                                                   |                                                                                                          |
|-----|----------------|---------------|---------------------------------------------------------------------------------|---------------------------------------------------------------------------------------------------------------------------------------------------------------------------------------------------------------------------------------------------------------------------------------------------------------------------------------------------------------------------------------------------------------------------------------------------------------------------------------------------------------------------------------------------|----------------------------------------------------------------------------------------------------------|
| 119 | Terbutylazine  | [5915-41-3]   | C <sub>9</sub> H <sub>16</sub> ClN <sub>5</sub>                                 | C <sub>9</sub> H <sub>16</sub> ClN <sub>5</sub> Na,C <sub>9</sub> H <sub>16</sub> ClN <sub>5</sub> NH <sub>4</sub> ,C <sub>9</sub> H <sub>17</sub> [37Cl]N <sub>5</sub> ,C <sub>9</sub> H <sub>17</sub> ClN <sub>5</sub> ,C <sub>5</sub> H <sub>9</sub> [37Cl]N <sub>5</sub> ,C <sub>5</sub> H <sub>9</sub> ClN <sub>5</sub> ,<br>C <sub>2</sub> H <sub>3</sub> [37Cl]N <sub>3</sub> ,C <sub>2</sub> H <sub>3</sub> ClN <sub>3</sub> ,C <sub>4</sub> H <sub>6</sub> N <sub>3</sub> ,C <sub>2</sub> H <sub>2</sub> N <sub>3</sub>                  | 252.0986,247.1432,232.1139,230.1167,176.0512,174.0541,105.9981,<br>104.001,96.0556,68.0243               |
| 120 | Tetraconazole  | [112281-77-3] | C <sub>13</sub> H <sub>11</sub> Cl <sub>2</sub> F <sub>4</sub> N <sub>3</sub> O | C <sub>13</sub> H <sub>11</sub> Cl <sub>2</sub> F <sub>4</sub> N <sub>3</sub> ONa,C <sub>13</sub> H <sub>11</sub> Cl <sub>2</sub> F <sub>4</sub> N <sub>3</sub> ONH <sub>4</sub> ,C <sub>13</sub> H <sub>12</sub> Cl[37Cl]F <sub>4</sub> N <sub>3</sub> O,C <sub>13</sub> H <sub>12</sub> Cl <sub>2</sub> F <sub>4</sub> N <sub>3</sub> O,<br>C <sub>7</sub> H <sub>5</sub> Cl[37Cl],C <sub>7</sub> H <sub>5</sub> Cl <sub>2</sub> ,C <sub>2</sub> H <sub>4</sub> N <sub>3</sub>                                                                  | 394.0108,389.0554,374.026,372.0288,160.9734,158.9763,70.04                                               |
| 121 | Thiobencarb    | [28249-77-6]  | C <sub>12</sub> H <sub>16</sub> ClNOS                                           | C <sub>12</sub> H <sub>16</sub> ClNOSNa,C <sub>12</sub> H <sub>16</sub> ClNOSNH <sub>4</sub> ,C <sub>12</sub> H <sub>17</sub> [37Cl]NOS,C <sub>12</sub> H <sub>17</sub> ClNOS,C <sub>7</sub> H <sub>6</sub> [37Cl],<br>C <sub>7</sub> H <sub>6</sub> Cl,C <sub>7</sub> H <sub>5</sub>                                                                                                                                                                                                                                                             | 280.0533,275.0979,260.0686,258.0714,127.0124,125.0153,89.0386                                            |
| 122 | Acetochlor     | [34256-82-1]  | C <sub>14</sub> H <sub>20</sub> ClNO <sub>2</sub>                               | C <sub>14</sub> H <sub>20</sub> ClNO <sub>2</sub> Na,C <sub>14</sub> H <sub>20</sub> [37Cl]NO <sub>2</sub> NH <sub>4</sub> ,C <sub>14</sub> H <sub>20</sub> ClNO <sub>2</sub> NH <sub>4</sub> ,C <sub>14</sub> H <sub>21</sub> [37Cl]NO <sub>2</sub> ,<br>C <sub>14</sub> H <sub>21</sub> ClNO <sub>2</sub> ,C <sub>12</sub> H <sub>15</sub> [37Cl]NO,C <sub>12</sub> H <sub>15</sub> ClNO,C <sub>10</sub> H <sub>14</sub> N,C <sub>9</sub> H <sub>11</sub> N,C <sub>9</sub> H <sub>10</sub> N,C <sub>3</sub> H <sub>7</sub> O                    | 292.1075,289.1496,287.1521,272.123,270.1255,226.081,224.0837,148.1121,<br>133.0886,132.0808,59.0491      |
| 123 | Alachlor       | [15972-60-8]  | C <sub>14</sub> H <sub>20</sub> ClNO <sub>2</sub>                               | C <sub>14</sub> H <sub>20</sub> ClNO <sub>2</sub> Na,C <sub>14</sub> H <sub>20</sub> [37Cl]NO <sub>2</sub> NH <sub>4</sub> ,C <sub>14</sub> H <sub>20</sub> ClNO <sub>2</sub> NH <sub>4</sub> ,C <sub>14</sub> H <sub>21</sub> [37Cl]NO <sub>2</sub> ,<br>C <sub>14</sub> H <sub>21</sub> ClNO <sub>2</sub> ,C <sub>13</sub> H <sub>17</sub> [37Cl]NO,C <sub>13</sub> H <sub>17</sub> ClNO,C <sub>11</sub> H <sub>16</sub> N,C <sub>10</sub> H <sub>13</sub> N,C <sub>9</sub> H <sub>10</sub> N                                                   | 292.1075,289.1496,287.1521,272.123,270.1255,240.0967,238.0993,<br>162.1277,147.1043,132.0808             |
| 124 | Ametryn        | [834-12-8]    | C <sub>9</sub> H <sub>17</sub> N <sub>5</sub> S                                 | C <sub>9</sub> H <sub>17</sub> N <sub>5</sub> SNa,C <sub>9</sub> H <sub>17</sub> N <sub>5</sub> NH <sub>4</sub> ,C <sub>9</sub> H <sub>18</sub> N <sub>5</sub> S,C <sub>6</sub> H <sub>12</sub> N <sub>5</sub> S,C <sub>4</sub> H <sub>6</sub> N <sub>3</sub> ,C <sub>2</sub> H <sub>4</sub> N <sub>3</sub> ,C <sub>3</sub> H <sub>7</sub> N <sub>2</sub> ,C <sub>2</sub> H <sub>2</sub> N <sub>3</sub>                                                                                                                                           | 250.1097,245.1543,228.1277,186.0808,96.0556,74.0059,71.0604,68.0243                                      |
| 125 | Atrazine       | [1912-24-9]   | C <sub>6</sub> H <sub>14</sub> ClN <sub>5</sub>                                 | C <sub>8</sub> H <sub>14</sub> ClN <sub>5</sub> Na,C <sub>8</sub> H <sub>14</sub> ClN <sub>5</sub> NH <sub>4</sub> ,C <sub>8</sub> H <sub>15</sub> [37Cl]N <sub>5</sub> ,C <sub>8</sub> H <sub>15</sub> ClN <sub>5</sub> ,C <sub>5</sub> H <sub>9</sub> [37Cl]N <sub>5</sub> ,C <sub>5</sub> H <sub>9</sub> ClN <sub>5</sub> ,<br>C <sub>2</sub> H <sub>3</sub> [37Cl]N <sub>3</sub> ,C <sub>2</sub> H <sub>3</sub> ClN <sub>3</sub> ,C <sub>4</sub> H <sub>6</sub> N <sub>3</sub> ,C <sub>2</sub> H <sub>2</sub> N <sub>3</sub> ,CH[37Cl]N,CHClN | 238.083,233.1276,218.0982,216.101,176.0512,174.0541,105.9981,104.001,<br>96.0556,68.0243,63.9763,61.9792 |
| 126 | Butachlor      | [23184-66-9]  | C <sub>17</sub> H <sub>26</sub> ClNO <sub>2</sub>                               | C <sub>17</sub> H <sub>26</sub> ClNO <sub>2</sub> Na,C <sub>17</sub> H <sub>26</sub> ClNO <sub>2</sub> NH <sub>4</sub> ,C <sub>17</sub> H <sub>27</sub> [37Cl]NO <sub>2</sub> ,C <sub>17</sub> H <sub>27</sub> ClNO <sub>2</sub> ,C <sub>13</sub> H <sub>17</sub> [37Cl]NO,<br>C <sub>13</sub> H <sub>17</sub> ClNO,C <sub>11</sub> H <sub>16</sub> N,C <sub>10</sub> H <sub>13</sub> N,C <sub>9</sub> H <sub>10</sub> N,C <sub>4</sub> H <sub>9</sub>                                                                                            | 334.1544,329.199,314.1701,312.1725,240.0967,238.0993,162.1277,<br>147.1043,132.0808,57.0699              |
| 127 | Edifenphos     | [17109-49-8]  | C <sub>14</sub> H <sub>15</sub> O <sub>2</sub> PS <sub>2</sub>                  | C <sub>14</sub> H <sub>15</sub> O <sub>2</sub> PS <sub>2</sub> Na,C <sub>14</sub> H <sub>15</sub> O <sub>2</sub> PS <sub>2</sub> NH <sub>4</sub> ,C <sub>14</sub> H <sub>16</sub> O <sub>2</sub> PS <sub>2</sub> ,C <sub>12</sub> H <sub>12</sub> O <sub>2</sub> PS <sub>2</sub> ,C <sub>6</sub> H <sub>6</sub> O <sub>2</sub> PS,C <sub>6</sub> H <sub>7</sub> S,<br>C <sub>6</sub> H <sub>5</sub> S,C <sub>6</sub> H <sub>5</sub>                                                                                                               | 333.0143,328.0589,311.0324,283.0011,172.9821,111.0263,109.0106,<br>77.0386                               |
| 128 | Ethion         | [563-12-2]    | C <sub>9</sub> H <sub>22</sub> O <sub>4</sub> P <sub>2</sub> S <sub>4</sub>     | C <sub>9</sub> H <sub>22</sub> O <sub>4</sub> P <sub>2</sub> S <sub>4</sub> Na,C <sub>9</sub> H <sub>22</sub> O <sub>4</sub> P <sub>2</sub> S <sub>4</sub> NH <sub>4</sub> ,C <sub>9</sub> H <sub>23</sub> O <sub>4</sub> P <sub>2</sub> S <sub>4</sub> ,C <sub>5</sub> H <sub>12</sub> O <sub>2</sub> PS <sub>2</sub> ,C <sub>3</sub> H <sub>8</sub> O <sub>2</sub> PS <sub>2</sub> ,CH <sub>4</sub> O <sub>2</sub> PS <sub>2</sub> ,<br>H <sub>2</sub> O <sub>2</sub> PS                                                                        | 406.9768,402.0214,384.9949,199.0011,170.9698,142.9385,96.9509                                            |
| 129 | Fenothiocarb   | [62850-32-2]  | C <sub>13</sub> H <sub>19</sub> NO <sub>2</sub> S                               | C <sub>13</sub> H <sub>19</sub> NO <sub>2</sub> SNa,C <sub>13</sub> H <sub>19</sub> NO <sub>2</sub> SNH <sub>4</sub> ,C <sub>13</sub> H <sub>20</sub> NO <sub>2</sub> S,C <sub>7</sub> H <sub>14</sub> NOS,C <sub>7</sub> H <sub>7</sub> O,C <sub>6</sub> H <sub>5</sub> ,C <sub>3</sub> H <sub>6</sub> NO                                                                                                                                                                                                                                        | 276.1029,271.1475,254.1209,160.0791,107.0491,77.0386,72.0444                                             |
| 130 | Fenthion       | [55-38-9]     | C <sub>10</sub> H <sub>15</sub> O <sub>3</sub> PS <sub>2</sub>                  | C <sub>10</sub> H <sub>15</sub> O <sub>3</sub> PS <sub>2</sub> Na,C <sub>10</sub> H <sub>15</sub> O <sub>3</sub> PS <sub>2</sub> NH <sub>4</sub> ,C <sub>10</sub> H <sub>16</sub> O <sub>3</sub> PS <sub>2</sub> ,C <sub>9</sub> H <sub>12</sub> O <sub>2</sub> PS <sub>2</sub> ,C <sub>8</sub> H <sub>9</sub> S <sub>2</sub> ,C <sub>2</sub> H <sub>6</sub> O <sub>2</sub> PS,<br>C <sub>8</sub> H <sub>9</sub> ,C <sub>7</sub> H <sub>7</sub> ,CH <sub>4</sub> O <sub>2</sub> P                                                                 | 301.0092,296.0538,279.0273,247.0011,169.014,124.9821,105.0699,91.0542,<br>78.9943                        |
| 131 | Iprobenfos     | [26087-47-8]  | C <sub>13</sub> H <sub>21</sub> O <sub>3</sub> PS                               | C <sub>13</sub> H <sub>21</sub> O <sub>3</sub> PSNa,C <sub>13</sub> H <sub>21</sub> O <sub>3</sub> PSNH <sub>4</sub> ,C <sub>13</sub> H <sub>22</sub> O <sub>3</sub> PS,C <sub>10</sub> H <sub>16</sub> O <sub>3</sub> PS,C <sub>7</sub> H <sub>10</sub> O <sub>3</sub> PS,C <sub>7</sub> H <sub>7</sub> ,C <sub>5</sub> H <sub>5</sub>                                                                                                                                                                                                           | 311.0841,306.1287,289.1022,247.0552,205.0083,91.0542,65.0386                                             |
| 132 | Isoprothiolane | [50512-35-1]  | C <sub>12</sub> H <sub>18</sub> O <sub>4</sub> S <sub>2</sub>                   | C <sub>12</sub> H <sub>18</sub> O <sub>4</sub> S <sub>2</sub> Na,C <sub>12</sub> H <sub>18</sub> O <sub>4</sub> S <sub>2</sub> NH <sub>4</sub> ,C <sub>12</sub> H <sub>19</sub> O <sub>4</sub> S <sub>2</sub> ,C <sub>9</sub> H <sub>11</sub> O <sub>3</sub> S <sub>2</sub> ,C <sub>6</sub> H <sub>5</sub> O <sub>3</sub> S <sub>2</sub> ,C <sub>5</sub> H <sub>5</sub> O <sub>3</sub> S <sub>2</sub> ,C <sub>2</sub> H <sub>5</sub> S <sub>2</sub>                                                                                               | 313.0539,308.0985,291.0719,231.0144,188.9675,144.9776,88.9514                                            |
| 133 | Mefenacet      | [73250-68-7]  | C <sub>16</sub> H <sub>14</sub> N <sub>2</sub> O <sub>2</sub> S                 | C <sub>16</sub> H <sub>14</sub> N <sub>2</sub> O <sub>2</sub> SNa,C <sub>16</sub> H <sub>14</sub> N <sub>2</sub> O <sub>2</sub> SNH <sub>4</sub> ,C <sub>16</sub> H <sub>15</sub> N <sub>2</sub> O <sub>2</sub> S,C <sub>9</sub> H <sub>6</sub> NO <sub>2</sub> S,C <sub>9</sub> H <sub>10</sub> NO,C <sub>8</sub> H <sub>10</sub> N,C <sub>7</sub> H <sub>7</sub>                                                                                                                                                                                | 321.0668,316.1114,299.0849,192.0114,148.0757,120.0808,91.0542                                            |

|     |                 |               |                                                                                |                                                                                                                                                                                                                                             |                                                                                                                                 |
|-----|-----------------|---------------|--------------------------------------------------------------------------------|---------------------------------------------------------------------------------------------------------------------------------------------------------------------------------------------------------------------------------------------|---------------------------------------------------------------------------------------------------------------------------------|
| 134 | Metribuzin      | [21087-64-9]  | C <sub>8</sub> H <sub>14</sub> N <sub>4</sub> OS                               | C8H14N4OSNa,C8H14N4OSNH4,C8H15N4OS,C7H15N4S,C5H10N,C2H4NS,CH2NS,C4H9                                                                                                                                                                        | 237.0781,232.1227,215.0961,187.1012,84.0808,74.0059,59.9902,57.0699                                                             |
| 135 | Molinate        | [2212-67-1]   | C <sub>9</sub> H <sub>17</sub> NOS                                             | C9H17NOSNa,C9H17NOSNH4,C9H18NOS,C7H12NO,C6H12N,C6H11,C4H7                                                                                                                                                                                   | 210.0923,205.1369,188.1104,126.0913,98.0964,83.0855,55.0542                                                                     |
| 136 | Paclbutrazol    | [76738-62-0]  | C <sub>15</sub> H <sub>20</sub> ClN <sub>3</sub> O                             | C15H20ClN3ONa,C15H20ClN3ONH4,C15H21[37Cl]N3O,C15H21ClN3O,C7H6[37Cl],<br>C7H6Cl,C2H4N3                                                                                                                                                       | 316.1187,311.1633,296.1342,294.1368,127.0124,125.0153,70.04                                                                     |
| 137 | Parathion       | [56-38-2]     | C <sub>10</sub> H <sub>14</sub> NO <sub>3</sub> PS                             | C10H14NO5PSNa,C10H14NO5PSNH4,C10H15NO5PS,C8H11NO5PS,C6H7NO5PS,<br>C6H6NO3,C6H5NO2,H2O2PS,C6H6O                                                                                                                                              | 314.0223,309.0669,292.0403,264.009,235.9777,140.0342,123.0315,96.9508,<br>94.0413                                               |
| 138 | Pendimethalin   | [40487-42-1]  | C <sub>13</sub> H <sub>18</sub> N <sub>2</sub> O <sub>4</sub>                  | C13H19N3O4Na,C13H19N3O4NH4,C13H20N3O4,C8H10N3O4,C8H8N3O3,C8H8N2O,<br>C7H7N2,C5H5                                                                                                                                                            | 304.1268,299.1714,282.1448,212.0666,194.056,148.0631,119.0604,65.0386                                                           |
| 139 | Phosmet         | [732-11-6]    | C <sub>11</sub> H <sub>12</sub> NO <sub>4</sub> PS <sub>2</sub>                | C11H12NO4PS2Na,C11H12NO4PS2NH4,C11H13NO4PS2,C10H11NO4PS,C9H6NO2,<br>C8H5O2,C2H8NP                                                                                                                                                           | 339.9838,335.0284,318.0018,272.0141,160.0393,133.0284,77.0389                                                                   |
| 140 | Pretilachlor    | [51218-49-6]  | C <sub>17</sub> H <sub>26</sub> ClNO <sub>2</sub>                              | C17H26ClNO2Na,C17H26ClNO2NH4,C17H27[37Cl]NO2,C17H27ClNO2,C14H19[37Cl]NO,<br>C14H19ClNO,C12H18N,C10H13N,C9H10N                                                                                                                               | 334.1544,329.199,314.1701,312.1725,254.1124,252.115,176.1434,147.1043,<br>132.0808                                              |
| 141 | Profenofos      | [41198-08-7]  | C <sub>11</sub> H <sub>15</sub> BrClO <sub>3</sub> PS                          | C11H15BrClO3PSNa,C11H15BrClO3PSNH4,C11H16[81Br][37Cl]O3PS,<br>C11H16[81Br]ClO3PS,C11H16BrClO3PS,C9H12[81Br][37Cl]O3PS,C9H12[81Br]ClO3PS,<br>C9H12BrClO3PS,C6H6[81Br][37Cl]O3PS,C6H6[81Br]ClO3PS,C6H6BrClO3PS,C6H5[37Cl]O,<br>C6H5ClO,H2O2PS | 394.9244,389.969,376.9376,374.9402,372.9424,348.9062,346.9088,<br>344.9111,306.8592,304.8619,302.8642,129.9995,128.0023,96.9508 |
| 142 | Prometryn       | [7287-19-6]   | C <sub>10</sub> H <sub>19</sub> N <sub>3</sub> S                               | C10H19N5SNa,C10H19N5SNH4,C10H20N5S,C7H14N5S,C4H8N5S,C2H4NS,C2H2N3                                                                                                                                                                           | 264.1253,259.1699,242.1434,200.0964,158.0495,74.0059,68.0243                                                                    |
| 143 | Pyridaphenthion | [119-12-0]    | C <sub>14</sub> H <sub>17</sub> N <sub>2</sub> O <sub>4</sub> PS               | C14H17N2O4PSNa,C14H17N2O4PSNH4,C14H18N2O4PS,C10H9N2OS,C10H9N2O2,<br>H2O2PS,C6H6N                                                                                                                                                            | 363.0539,358.0985,341.0719,205.043,189.0659,96.9508,92.0495                                                                     |
| 144 | Quinalphos      | [13593-03-8]  | C <sub>12</sub> H <sub>15</sub> N <sub>2</sub> O <sub>3</sub> PS               | C12H15N2O3PSNa,C12H15N2O3PSNH4,C12H16N2O3PS,C10H12N2O3PS,C8H7N2S,<br>C8H7N2O,C8H5N2,H2O2PS                                                                                                                                                  | 321.0433,316.0879,299.0614,271.0301,163.0324,147.0553,129.0447,<br>96.9508                                                      |
| 145 | tau-Fluvalinate | [102851-06-9] | C <sub>26</sub> H <sub>22</sub> ClF <sub>3</sub> N <sub>2</sub> O <sub>3</sub> | C26H22ClF3N2O3Na,C26H22ClF3N2O3NH4,C26H23[37Cl]F3N2O3,C26H23ClF3N2O3,<br>C14H10NO,C13H9O                                                                                                                                                    | 525.1163,520.1609,505.1326,503.1344,208.0757,181.0648                                                                           |
| 146 | Triadimefon     | [43121-43-3]  | C <sub>14</sub> H <sub>16</sub> ClN <sub>3</sub> O <sub>2</sub>                | C14H16ClN3O2Na,C14H16ClN3O2NH4,C14H17[37Cl]N3O2,C14H17ClN3O2,<br>C9H12[37Cl]N3,C9H12ClN3,C5H9,C4H9,C4H7                                                                                                                                     | 316.0823,311.1269,296.0979,294.1004,199.0686,197.0714,69.0699,57.0699,<br>55.0542                                               |

|     |              |              |                                                                   |                                                                                                                                                                                                                                                                                                                                                                                                                                                                                                                                                                                                                                                                        |                                                                                                   |
|-----|--------------|--------------|-------------------------------------------------------------------|------------------------------------------------------------------------------------------------------------------------------------------------------------------------------------------------------------------------------------------------------------------------------------------------------------------------------------------------------------------------------------------------------------------------------------------------------------------------------------------------------------------------------------------------------------------------------------------------------------------------------------------------------------------------|---------------------------------------------------------------------------------------------------|
| 147 | Dimethoate   | [60-51-5]    | C <sub>5</sub> H <sub>12</sub> NO <sub>3</sub> PS <sub>2</sub>    | C <sub>5</sub> H <sub>12</sub> NO <sub>3</sub> PS <sub>2</sub> Na, C <sub>5</sub> H <sub>12</sub> NO <sub>3</sub> PS <sub>2</sub> NH <sub>4</sub> , C <sub>5</sub> H <sub>13</sub> NO <sub>3</sub> PS <sub>2</sub> , C <sub>4</sub> H <sub>8</sub> O <sub>3</sub> PS <sub>2</sub> , C <sub>3</sub> H <sub>8</sub> O <sub>2</sub> PS <sub>2</sub> , C <sub>2</sub> H <sub>6</sub> O <sub>2</sub> PS, C <sub>3</sub> H <sub>6</sub> NS, CH <sub>4</sub> O <sub>2</sub> P                                                                                                                                                                                                 | 251.9888, 247.0334, 230.0069, 198.9647, 170.9698, 124.9821, 88.0215, 78.9943                      |
| 148 | Pirimicarb   | [23103-98-2] | C <sub>11</sub> H <sub>18</sub> N <sub>4</sub> O <sub>2</sub>     | C <sub>11</sub> H <sub>18</sub> N <sub>4</sub> O <sub>2</sub> Na, C <sub>11</sub> H <sub>18</sub> N <sub>4</sub> O <sub>2</sub> NH <sub>4</sub> , C <sub>11</sub> H <sub>19</sub> N <sub>4</sub> O <sub>2</sub> , C <sub>9</sub> H <sub>16</sub> N <sub>3</sub> O, C <sub>4</sub> H <sub>9</sub> N <sub>2</sub> , C <sub>3</sub> H <sub>6</sub> NO, C <sub>2</sub> H <sub>2</sub> NO                                                                                                                                                                                                                                                                                   | 261.1322, 256.1768, 239.1503, 182.1288, 85.076, 72.0444, 56.0131                                  |
| 149 | Anilofos     | [64249-01-0] | C <sub>13</sub> H <sub>19</sub> ClNO <sub>3</sub> PS <sub>2</sub> | C <sub>13</sub> H <sub>19</sub> ClNO <sub>3</sub> PS <sub>2</sub> Na, C <sub>13</sub> H <sub>19</sub> ClNO <sub>3</sub> PS <sub>2</sub> NH <sub>4</sub> , C <sub>13</sub> H <sub>20</sub> [ <sup>37</sup> Cl]NO <sub>3</sub> PS <sub>2</sub> , C <sub>13</sub> H <sub>20</sub> ClNO <sub>3</sub> PS <sub>2</sub> , C <sub>4</sub> H <sub>8</sub> O <sub>3</sub> PS <sub>2</sub> , C <sub>3</sub> H <sub>8</sub> O <sub>2</sub> PS <sub>2</sub> , C <sub>2</sub> H <sub>6</sub> O <sub>2</sub> PS <sub>2</sub> , C <sub>2</sub> H <sub>6</sub> O <sub>2</sub> PS, CH <sub>4</sub> O <sub>2</sub> P                                                                      | 390.0125, 385.0571, 370.0277, 368.0305, 198.9647, 170.9698, 156.9541, 124.9821, 78.9943           |
| 150 | Chlorpyrifos | [2921-88-2]  | C <sub>9</sub> H <sub>11</sub> Cl <sub>3</sub> NO <sub>3</sub> PS | C <sub>9</sub> H <sub>11</sub> Cl <sub>3</sub> NO <sub>3</sub> PSNa, C <sub>9</sub> H <sub>11</sub> Cl <sub>3</sub> NO <sub>3</sub> PSNH <sub>4</sub> , C <sub>9</sub> H <sub>12</sub> Cl[ <sup>37</sup> Cl]NO <sub>3</sub> PS, C <sub>9</sub> H <sub>12</sub> Cl <sub>2</sub> [ <sup>37</sup> Cl]NO <sub>3</sub> PS, C <sub>9</sub> H <sub>12</sub> Cl <sub>3</sub> NO <sub>3</sub> PS, C <sub>5</sub> H <sub>3</sub> Cl[ <sup>37</sup> Cl] <sub>2</sub> NO, C <sub>5</sub> H <sub>3</sub> Cl <sub>2</sub> [ <sup>37</sup> Cl]NO, C <sub>5</sub> H <sub>3</sub> Cl <sub>3</sub> NO, C <sub>2</sub> H <sub>6</sub> O <sub>2</sub> PS, H <sub>2</sub> O <sub>2</sub> PS | 371.9155, 366.9601, 353.9278, 351.9306, 349.9336, 201.9217, 199.9246, 197.9275, 124.9821, 96.9508 |



30 banned pesticides in standard solutions and *Isatidis Folium* were used to evaluate the anti-interference capability of SWATH and AIF. The results showed that lower signal intensity and less fragment ions can be achieved for pesticides in *Isatidis Folium* regardless of the acquisition mode being SWATH or AIF. What's more, the signal intensity and the number of fragment ions decreased more significantly for SWATH. Taking ethoprophos at 1 ng/mL as an example to explain the different matrix effect for the two acquisition modes. For SWATH, when the  $[M+H]^+$  of ethoprophos ( $C_8H_{20}O_2PS_2$ , the accurate  $m/z$  is 243.0637) was used as a precursor ion, five fragment ions with  $m/z$  96.9510, 130.9389, 172.9854, 215.0332, 243.0640 (which may correspond to  $H_2O_2PS$ ,  $H_4O_2PS_2$ ,  $C_3H_{10}O_2PS_2$ ,  $C_6H_{16}O_2PS_2$ , and  $C_8H_{20}O_2PS_2$  of ethoprophos) can be found in MS/MS spectra of standard solutions, but only one fragment ion with  $m/z$  172.9854 (which may refer to  $C_3H_{10}O_2PS_2$  of ethoprophos) can be found in MS/MS spectra of the spiked *Isatidis Folium* (Figure S1). In addition, the peak of  $[M+H]^+$  in MS spectra and the peaks of potential fragment ions in MS/MS spectra were much lower for ethoprophos in *Isatidis Folium*. Similarly, three fragment ions, corresponding to  $H_2O_2PS$ ,  $H_4O_2PS_2$ ,  $C_3H_{10}O_2PS_2$  of ethoprophos, were filtered out in standard solutions using AIF (Figure S2). But there were still two fragment ions of ethoprophos can be found in the spiked *Isatidis Folium*. Compared with AIF, the spectra of SWATH are influenced more seriously by coeluting matrix. Therefore, the AIF exhibits more significantly anti-interference capability.

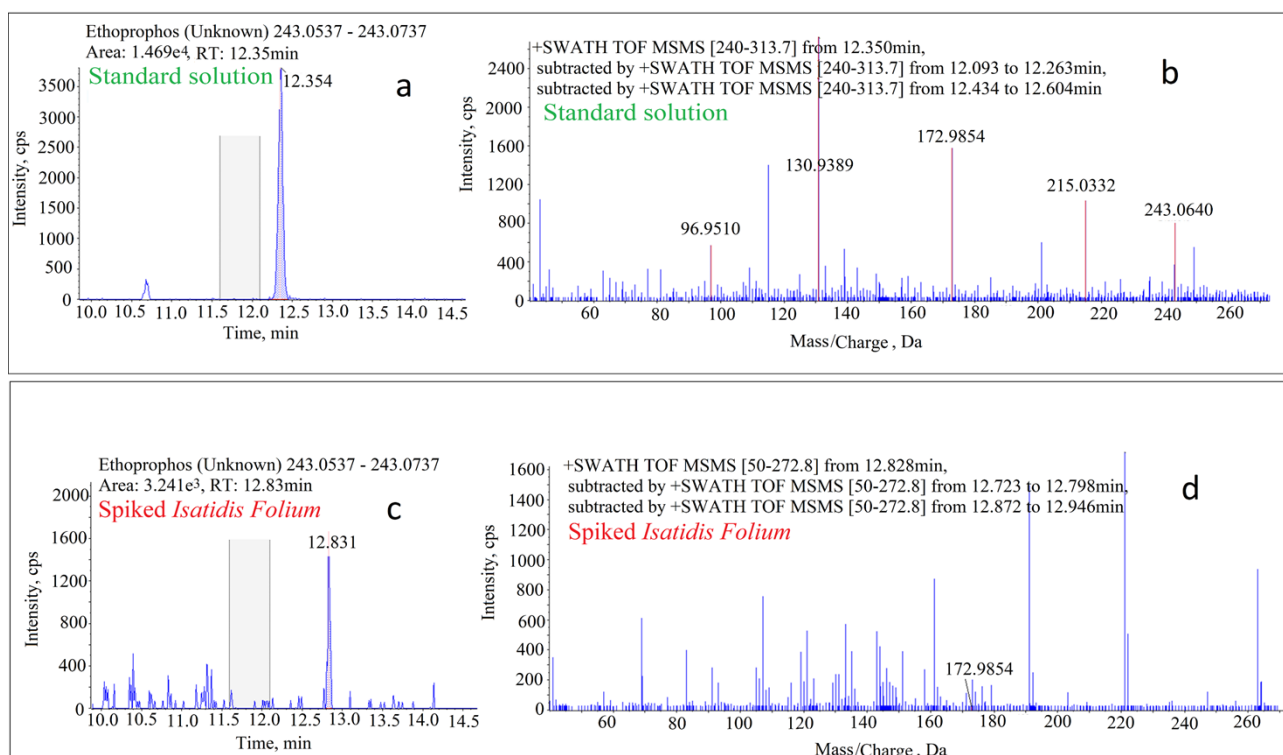

Figure S1 The MS and MS/MS results of ethoprophos using the acquisition mode of SWATH. (a) is the EIC of the  $[M+H]^+$  of ethoprophos in the standard solution. (b) is the MS/MS spectrum of the  $[M+H]^+$  of ethoprophos in standard solution. (c) is the EIC of the  $[M+H]^+$  of ethoprophos in the spiked *Isatidis Folium*. (d) is the MS/MS spectrum of the  $[M+H]^+$  of ethoprophos in the spiked *Isatidis Folium*.

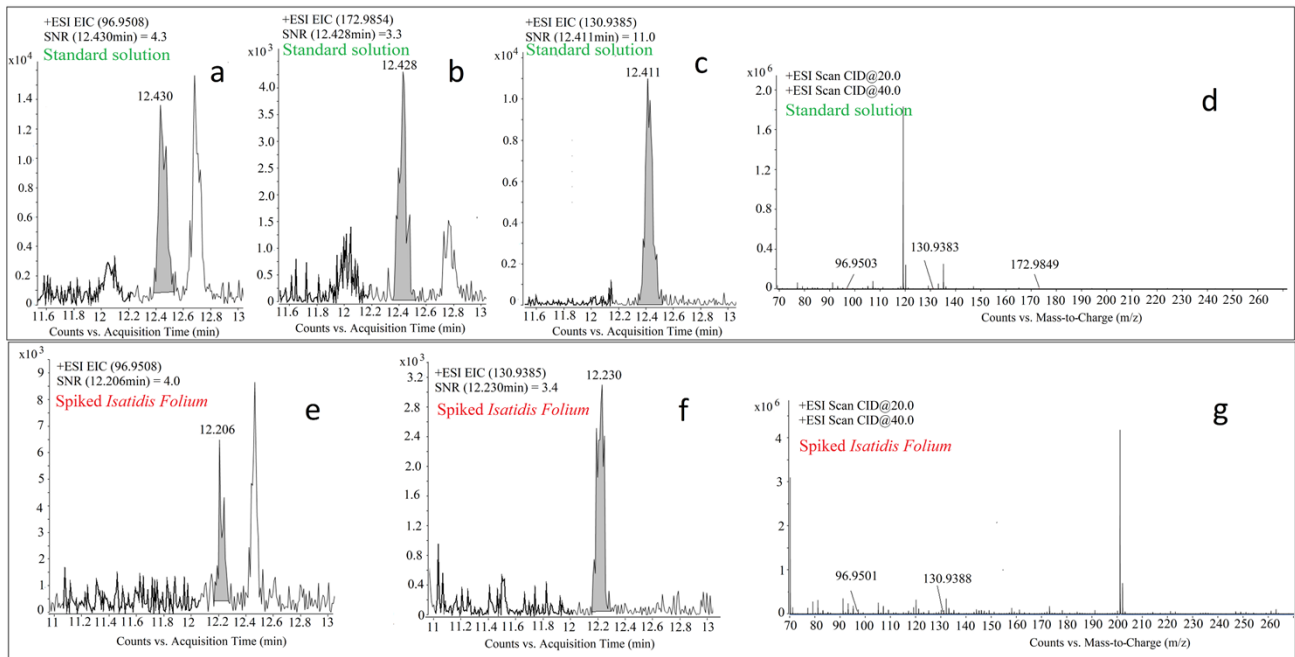

Figure S2 The MS and MS/MS results of ethoprophos using the acquisition mode of AIF. (a-c) is the EICs of the qualified ions of ethoprophos in the standard solution. (d) is the MS/MS spectrum of ethoprophos in standard solution. (e-f) is the EICs of the qualified ions of Ethoprophos in the spiked *Isatidis Folium*. (g) is the MS/MS spectrum of ethoprophos in the spiked *Isatidis Folium*.



To confirm phorate-sulfoxide in *Ganoderma* using targeted-MSMS, the  $[M+H]^+$  of phorate-sulfoxide ( $m/z$  277.0150) was used as a precursor ion. Five fragment ions with  $m/z$  64.9790, 96.9509, 142.9380, 170.9696, 199.0002, corresponding to H<sub>2</sub>O<sub>2</sub>P, H<sub>2</sub>O<sub>2</sub>PS, CH<sub>4</sub>O<sub>2</sub>PS<sub>2</sub>, C<sub>3</sub>H<sub>8</sub>O<sub>2</sub>PS<sub>2</sub>, C<sub>5</sub>H<sub>12</sub>O<sub>2</sub>PS<sub>2</sub> of phorate-sulfoxide, were found at 8.779 min.

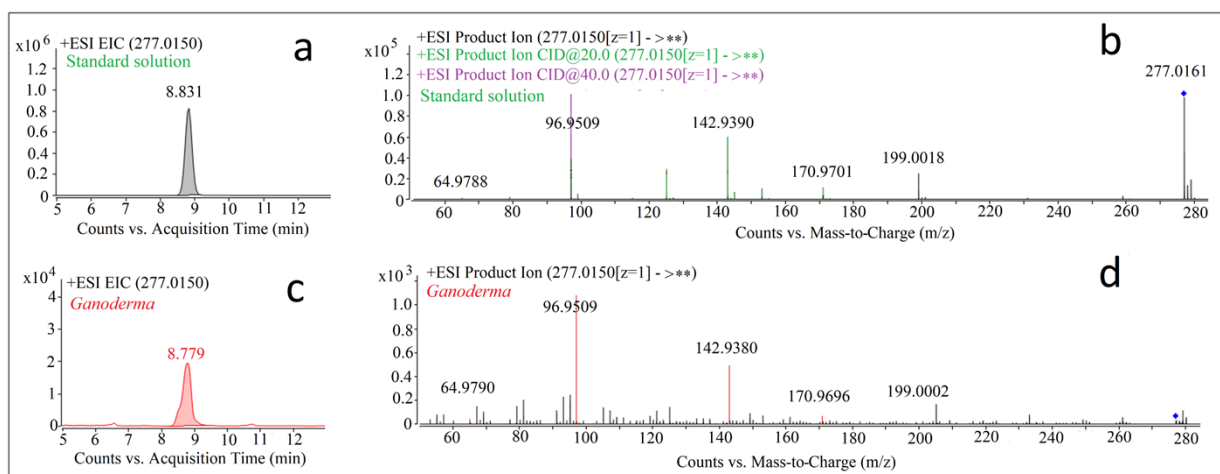

Figure S3 (a) is the EIC of the  $[M+H]^+$  of phorate-sulfoxide in standard solution. (b) is the overlaid fragmentation spectra of the  $[M+H]^+$  of phorate-sulfoxide in the standard solution. (c) is the EIC of the  $[M+H]^+$  of phorate-sulfoxide in *Ganoderma*. (d) is the overlaid fragmentation spectra of the  $[M+H]^+$  of phorate-sulfoxide in *Ganoderma*.

To confirm phorate-sulfone in *Ganoderma* using targeted-MSMS, the  $[M+H]^+$  of phorate-sulfone ( $m/z$  293.0099) was used as a precursor ion. Four fragment ions with  $m/z$  96.9502, 114.9612, 142.9920, 171.0257, corresponding to H<sub>2</sub>O<sub>2</sub>PS, H<sub>4</sub>O<sub>3</sub>PS, C<sub>2</sub>H<sub>8</sub>O<sub>3</sub>PS, C<sub>4</sub>H<sub>12</sub>O<sub>3</sub>PS of phorate-sulfone, were found at 10.889 min.

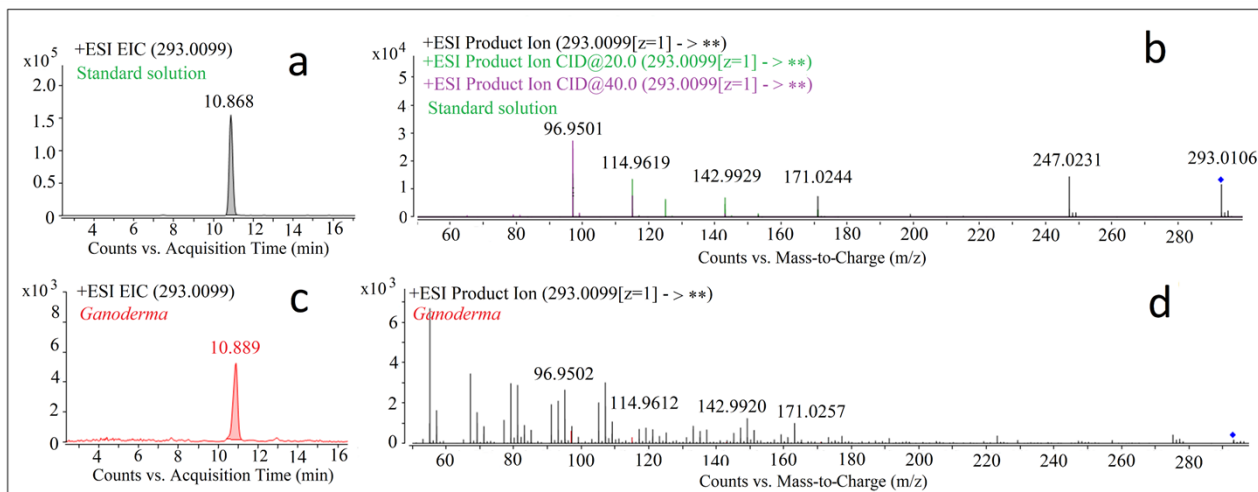

Figure S4 (a) is the EIC of the  $[M+H]^+$  of phorate-sulfone in standard solution. (b) is the overlaid fragmentation spectra of the  $[M+H]^+$  of phorate-sulfone in standard solution. (c) is the EIC of the  $[M+H]^+$  of phorate-sulfone in *Ganoderma*. (d) is the overlaid fragmentation spectra of the  $[M+H]^+$  of phorate-sulfone in *Ganoderma*.

To confirm terbufos-sulfoxide in *Foeniculi Fructus* using targeted-MSMS, the  $[M+H]^+$  of terbufos-sulfoxide ( $m/z$  305.0463) was used as a precursor ion. Five fragment ions with  $m/z$  57.0702, 96.9507, 130.9384, 158.9695, 187.0007, corresponding to C<sub>4</sub>H<sub>9</sub>, H<sub>2</sub>O<sub>2</sub>PS, H<sub>4</sub>O<sub>2</sub>PS<sub>2</sub>, C<sub>2</sub>H<sub>8</sub>O<sub>2</sub>PS<sub>2</sub>, C<sub>4</sub>H<sub>12</sub>O<sub>2</sub>PS<sub>2</sub> of terbufos-sulfoxid, were found at 10.577 min.

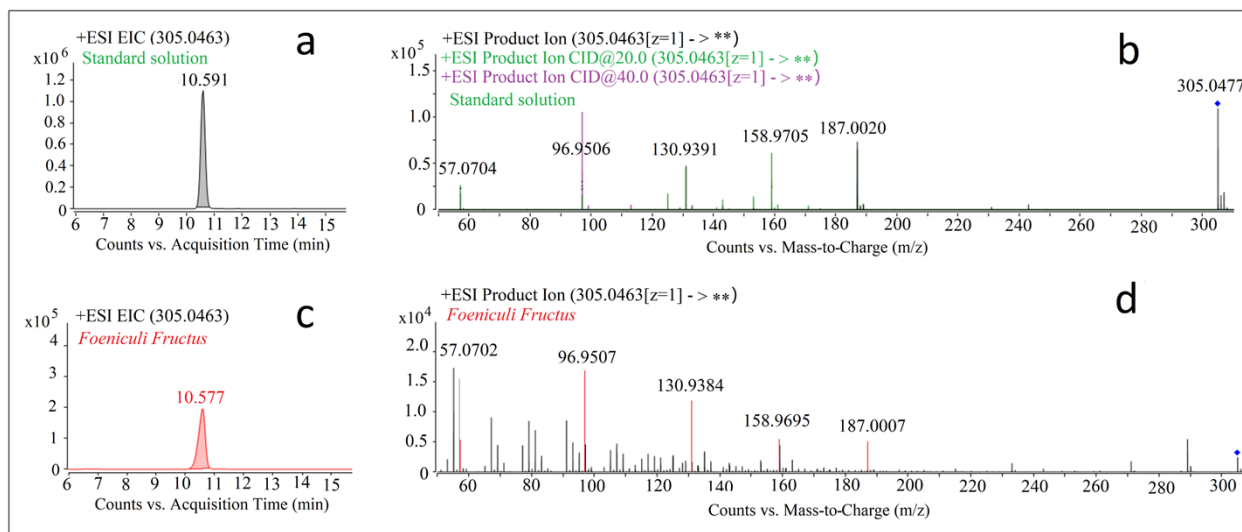

Figure S5 (a) is the EIC of the  $[M+H]^+$  of terbufos-sulfoxide in standard solution. (b) is the overlaid fragmentation spectra of the  $[M+H]^+$  of terbufos-sulfoxide in standard solution. (c) is the EIC of the  $[M+H]^+$  of terbufos-sulfoxide in *Foeniculi Fructus*. (d) is the overlaid fragmentation spectra of the  $[M+H]^+$  of terbufos-sulfoxide in *Foeniculi Fructus*.

To confirm terbufos-sulfone in *Foeniculi Fructus* using targeted-MSMS, the  $[M+H]^+$  of terbufos-sulfone ( $m/z$  321.0412) was used as a precursor ion. Four fragment ions with  $m/z$  96.9506, 114.9610, 142.9914, 171.0232, corresponding to H<sub>2</sub>O<sub>2</sub>PS, H<sub>4</sub>O<sub>3</sub>PS, C<sub>2</sub>H<sub>8</sub>O<sub>3</sub>PS, C<sub>4</sub>H<sub>12</sub>O<sub>3</sub>PS<sub>2</sub> of terbufos-sulfone, were found at 12.486 min.

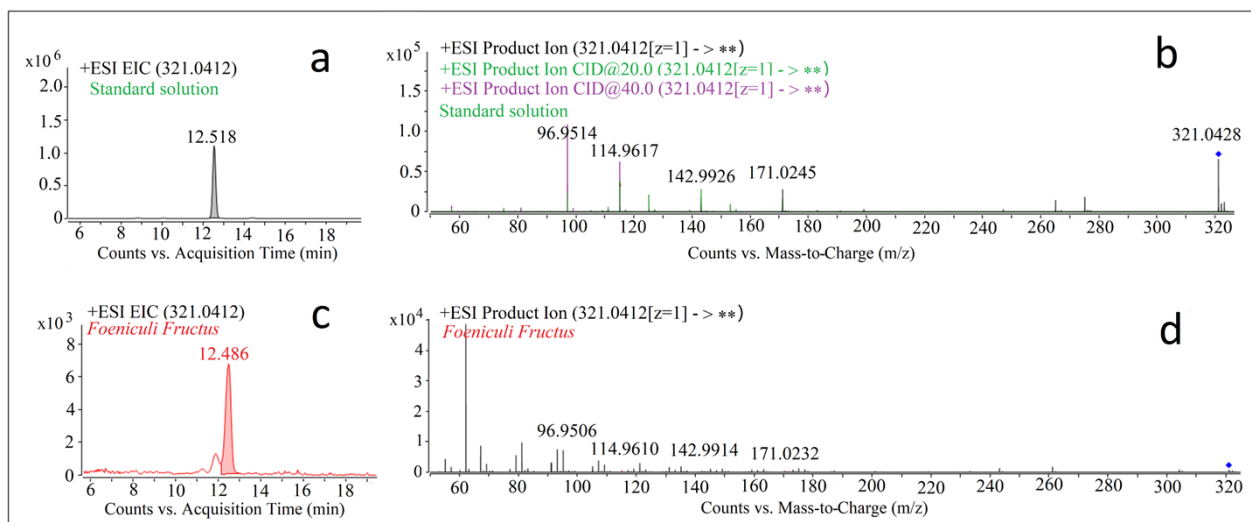

Figure S6 (a) is the EIC of the  $[M+H]^+$  of terbufos-sulfone in standard solution. (b) is the overlaid fragmentation spectra of the  $[M+H]^+$  of terbufos-sulfone in standard solution. (c) is the EIC of the  $[M+H]^+$  of terbufos-sulfone in *Foeniculi Fructus*. (d) is the overlaid fragmentation spectra of the  $[M+H]^+$  of terbufos-sulfone in *Foeniculi Fructus*.
